# Supplementary material for: Structural and non-coding variants increase the diagnostic yield of clinical whole genome sequencing for rare diseases
Source: Genome Med. 2023 Nov 9;15:94. doi: 10.1186/s13073-023-01240-0 (PMC10636885; doi:10.1186/s13073-023-01240-0)
Supplement: Supplementary file 3 — Additional file 3. Supplementary Tables S1-S9. [file 13073_2023_1240_MOESM3_ESM.xlsx]

## Sheet: Table S1_Variant Annotn
Supplementary Table S1: Variant annotation tools and versions used in WGS analysis pipeline
Annotation group	Data	Version
Global + EUR allele frequency	1000G	Phase 3
	gnomAD genomes	V3.0
	gnomAD exomes	v.2.1.1
	ExAC	v0.3
	UK10K
Known variants	HGMD	2014.4
	ClinVar	20190624
	COSMIC	v90
	dbSNP	151
Known pathogenic genes	ClinVar	20190624
	PanelApp	20200504
	ACMG	v2.0
Problematic regions	Segmental duplications
	Low mappability regions	As computed by genmap
	Low complexity regions	See 10.1093/bioinformatics/btu356
Conservation	PhyloP100
	PhastCons100way
Impact prediction scores (coding)	CADD	v1.5
	DANN	2019-08-01
	REVEL	2019-10-01
	MCAP	v1.4
	Polyphen2	From dbNSFP v4.0a
Impact prediction scores (non-coding)	FATHMM-MKL	v2.3
	FIRE	2019-11-01
	LinSight	2019-08-01
	ExPECTO	2019-10-01
	NCBoost	20190108
	ReMM	v0.3.1
Splicing impact predictions	dbscSNV	v1.1
	SpliceAI	v1.3
Regulatory regions	GREEN-DB	v2.5
Constrained regions	CCRs	2019-08-01

## Sheet: Table S2_Impact Categories
Supplementary Table S2: Impact categories for variants
Consequence	Impact	Location	Description
chromosome	LoF	exon	A large part (over 1%) of the chromosome was deleted.
duplication	LoF	exon	Duplication of a large chromosome segment (over 1% or 1,000,000 bases)
inversion	LoF	exon	Inversion of a large chromosome segment (over 1% or 1,000,000 bases).
exon_loss_variant	LoF	exon	A deletion that removes the whole/part of an exon.
frameshift_variant	LoF	exon	Insertion or deletion causes a frame shift e.g.: An indel size is not multple of 3
feature_ablation	LoF	exon	Deletion of a gene/rtanscript.
gene_fusion	gene	exon	Fusion of one gene and an intergenic region or one gene and an intergenic region.
bidirectional_gene_fusion	gene	exon	Fusion of two genes in opposite directions.
rearranged_at_DNA_level	unknown	exon	Rearrangement affecting one or more genes.
protein_protein_contact	unknown	exon	Protein-Protein interaction loci.
structural_interaction_variant	unknown	exon	Within protein interacion loci (e.g. two AA that are in contact within the same protein, prossibly helping structural conformation).
rare_amino_acid_variant	unknown	exon	The variant hits a rare amino acid thus is likely to produce protein loss of function
splice_acceptor_variant	LoF	splice_site_region	The variant hits a splice acceptor site (defined as two bases before exon start, except for the first exon).
splice_donor_variant	LoF	splice_site_region	The variant hits a Splice donor site (defined as two bases after coding exon end, except for the last exon).
stop_lost	LoF	exon	Variant causes stop codon to be mutated into a non-stop codon e.g.: Tga/Cga, */R
start_lost	LoF	exon	Variant causes start codon to be mutated into a non-start codon. e.g.: aTg/aGg, M/R
stop_gained	LoF	exon	Variant causes a STOP codon e.g.: Cag/Tag, Q/*
inframe_insertion,conservative_inframe_insertion	protchanging	exon	One or many codons are inserted e.g.: An insert multiple of three in a codon boundary
disruptive_inframe_insertion	protchanging	exon	One codon is changed and one or many codons are inserted e.g.: An insert of size multiple of three, not at codon boundary
inframe_deletion,conservative_inframe_deletion	protchanging	exon	One or many codons are deleted e.g.: A deletion multiple of three at codon boundary
disruptive_inframe_deletion	protchanging	exon	One codon is changed and one or more codons are deleted e.g.: A deletion of size multiple of three, not at codon boundary
missense_variant	protchanging	exon	Variant causes a codon that produces a different amino acid e.g.: Tgg/Cgg, W/R
splice_region_variant	splicing	splice_site_region	A sequence variant in which a change has occurred within the region of the splice site, either within 1-3 bases of the exon or 3-8 bases of the intron or affecting the putative (Lariat) branch point.
3_prime_UTR_truncation + exon_loss, 3_prime_UTR_truncation	exonic	utr	The variant deletes an exon which is in the 3'UTR of the transcript
5_prime_UTR_truncation + exon_loss_variant, 5_prime_UTR_truncation	exonic	utr	The variant deletes an exon which is in the 5'UTR of the transcript
sequence_feature + exon_loss_variant	exonic	exon	A 'NextProt' based annotation. Details are provided in the 'feature type' sub-field (ANN), or in the effect details (EFF).
coding_sequence_variant	protchanging	exon	One or many codons are changed e.g.: An MNP of size multiple of 3
initiator_codon_variant	exonic	exon	Variant causes start codon to be mutated into another start codon (the new codon produces a different AA). e.g.: Atg/Ctg, M/L (ATG and CTG can be START codons)
stop_retained_variant	exonic	exon	Variant causes stop codon to be mutated into another stop codon (the new codon produces a different AA). e.g.: Atg/Ctg, M/L (ATG and CTG can be START codons) OR Variant causes stop codon to be mutated into another stop codon. e.g.: taA/taG, */*
5_prime_UTR_premature_start_codon_gain_variant	exonic	exon	A variant in 5'UTR region produces a three base sequence that can be a START codon.
synonymous_variant	exonic	exon	Variant causes a codon that produces the same amino acid e.g.: Ttg/Ctg, L/L
start_retained	exonic	exon	Variant causes start codon to be mutated into another start codon. e.g.: Ttg/Ctg, L/L (TTG and CTG can be START codons)
non_coding_transcript_exon_variant,non_coding_transcript_variant,non_coding_transcript_intron_variant	exonic	exon	SO:0001619: A transcript variant of a non coding RNA gene.
downstream_gene_variant	gene	intergenic	Downstream of a gene (default length: 5K bases)
exon_variant	exonic	exon	The variant hits an exon (from a non-coding transcript) or a retained intron.
gene_variant	exonic	exon	The variant hits a gene.
intragenic_variant	gene	intergenic	The variant hits a gene, but no transcripts within the gene
intron_variant	gene	intron	Variant hits and intron. Technically, hits no exon in the transcript.
conserved_intron_variant	gene	intron	The variant is in a highly conserved intronic region
miRNA	unknown	exon	Variant affects an miRNA
transcript_variant	gene	exon	The variant hits a transcript.
regulatory_region_variant	regulatory	regulatory_region	The variant hits a known regulatory feature (non-coding).
upstream_gene_variant	gene	intergenic	Upstream of a gene (default length: 5K bases)
3_prime_UTR_variant	exonic	utr	Variant hits 3'UTR region
5_prime_UTR_variant	exonic	utr	Variant hits 5'UTR region
non_canonical_start_codon	exonic	exon	SO:0000680: A start codon that is not the usual AUG sequence.
exonic_sv	LoF	exon	SV overlapping an exonic region
utr_sv	exonic	utr	SV overlapping an utr region
intronic_sv	gene	intron	SV overlapping an intronic region
bivalent	regulatory	regulatory_region	A bivalent regulatory region
enhancer	regulatory	regulatory_region	An enhancer regulatory region
insulator	regulatory	regulatory_region	An insulator regulatory region
promoter	regulatory	regulatory_region	A promoter regulatory region
silencer	regulatory	regulatory_region	A silencer regulatory region

## Sheet: Table S3_WGS500 Class
Supplementary Table S3: WGS500 classification system for variants after Taylor et al Nature Genetics 2015
Category	Short Description	Long Description
A	likely novel gene	Mutation found in a novel gene, with additional genetic evidence (in unrelated cases) and/or functional data supporting causality.
B	novel (mechanism) for phenotype	Mutation found in a gene known for a different phenotype, with additional genetic evidence and/or functional data supporting causality.
C	known gene for phenotype	Mutation found in a known gene for this phenotype.
D	candidate gene	Mutation found in a novel gene, with further genetic and functional validation studies in progress.
E	multiple possible candidates (but none compelling)	Multiple candidate variants but none compelling.
F	no candidates identified	No single candidate yet, or negative results for validation of original candidates.
SF	secondary finding	Variant unrelated to the referred condition but with potential clinical and actionable significance

## Sheet: Table S4_Overall Stats
Supplementary Table S4: Cohort statistics for cases
property	value
n_pedigrees	122
n_individuals	300
n_affected_individuals	149
n_male	148
n_female	152
n_male_aff	75
n_female_aff	74
n_pathogenic	27
n_likely_pathogenic	12
n_evidence_of_causality	8
n_lead_candidate	12
n_unsolved	63
n_considered_solved	47

## Sheet: Table S5_Family Structures
Supplementary Table S5: Family size for each disease category
Disease Category	Disease Sub Category	Singleton (Probands)	Family Duo (Probands)	Family Trio (Probands)	Family Quartet (Probands)	Family Quintet (Probands)	TOTAL
Cardiovascular	Arrhythmia		1				1
Cardiovascular	Cardiomyopathy	2		1			3
Endocrine and renal	Disorders of calcium metabolism			2			2
Endocrine and renal	Fibrotic kidney disease		1			1	2
Endocrine and renal	Hypokalaemia		1				1
Gasteroenterological	Cholestasis	1		3			4
Gasteroenterological	Inflammatory bowel disease			1			1
Gasteroenterological	Intestinal obstruction			1		1	2
Haematological	Congenital anaemia	1	1	8	1		11
Haematological	Congenital Erythrocytosis	6	1	2			9
Haematological	Haemochromatosis			1			1
Immunological	Abnormality of thymus development			2	2	1	5
Immunological	Primary immunodeficiency		1	8	1		10
Musculoskeletal	Craniosynostosis	2	3	2			7
Musculoskeletal	Diffuse Skeletal Angiomatosis	1					1
Musculoskeletal	Skeletal muscle disorder	1					1
Neurological	Congenital brain malformations	3		18	2		23
Neurological	Epilepsy	13		7	1		21
Neurological	Intellectual Learning Disability			2			2
Neurological	Neuromuscular disorder	3	3	1			7
Tumour syndrome	Neuroendocrine Tumour				1		1
Ultra-rare disorders	Skeletal and multi-system anomalies		1	3	1		5
Vascular	Capillary malformation disorder			1			1
Vascular	Thrombocytosis	1					1
	TOTAL	34	13	63	9	3	122

## Sheet: Table S6_All Cases
Supplementary Table S6: Disease category, sub category and case solved status for each case in study
Case Id	Disease Category	Disease Sub Category	Disease	predicted_ancestry	Case Solved Status
013VEN001	Cardiovascular	Arrhythmia	Ventricular Fibrillation (Idiopathic)	EUR	Likely Pathogenic
013Chi001	Cardiovascular	Cardiomyopathy	Childhood dilated cardiomyopathy	EUR	Likely Pathogenic
013Foe001	Cardiovascular	Cardiomyopathy	Foetal Cardiomyopathy	EUR	Pathogenic
003Neo001	Cardiovascular	Cardiomyopathy	Neonatal cardiomyopathy	EUR	Lead Candidate
058HKS001	Endocrine and renal	Disorders of calcium metabolism	Hypercalciuria and kidney stones	EUR	Unsolved
058FANC001	Endocrine and renal	Disorders of calcium metabolism	Nephrocalcinosis, hypercalciuria and hypercalcaemia	EUR	Pathogenic
058FJHN001	Endocrine and renal	Fibrotic kidney disease	Familial juvenile hyperuricemic nephropathy	EUR	Likely Pathogenic
039Fib001	Endocrine and renal	Fibrotic kidney disease	Fibrotic KD	EUR	Likely Pathogenic
039Hyp001	Endocrine and renal	Hypokalaemia	Hypokalaemia	EUR	Likely Pathogenic
066GCD001	Gasteroenterological	Cholestasis	Genetic Cholestatic Disease and Biliary Fibrosis	EUR	Pathogenic
066NNC001	Gasteroenterological	Cholestasis	Neonatal Cholestasis with mild biliary changes and splenomegaly	EUR	Unsolved
066NNC002	Gasteroenterological	Cholestasis	Neonatal Cholestasis with mild biliary changes and splenomegaly	EUR	Pathogenic
066PIC001	Gasteroenterological	Cholestasis	Progressive familial intrahepatic cholestasis	AMR	Unsolved
012IBD001	Gasteroenterological	Inflammatory bowel disease	Inflammatory bowel disease	EUR	Unsolved
004Int002	Gasteroenterological	Intestinal obstruction	Intestinal Atresia	EUR	Unsolved
004Int001	Gasteroenterological	Intestinal obstruction	Intestinal Obstruction	EUR	Unsolved
023Con001	Haematological	Congenital anaemia	Congenital Anaemia	EUR	Unsolved
023CDA001	Haematological	Congenital anaemia	Congenital dyserythropoietic anaemia	EUR	Likely Pathogenic
023Une001	Haematological	Congenital anaemia	Congenital dyserythropoietic anaemia	EUR	Lead Candidate
027Con001	Haematological	Congenital anaemia	Congenital dyserythropoietic anaemia	EUR	Unsolved
032Con001	Haematological	Congenital anaemia	Congenital dyserythropoietic anaemia + Hypogammaglobulinemia	EUR	Unsolved
027Dia001	Haematological	Congenital anaemia	Diamond Blackfan Anemia	EUR	Unsolved
032Hem001	Haematological	Congenital anaemia	Hemolytic Anemia and Neutropenia	EUR	Unsolved
023Her001	Haematological	Congenital anaemia	Hereditary Spherocytosis	EUR	Pathogenic
023Her002	Haematological	Congenital anaemia	Hereditary Spherocytosis	EUR	Unsolved
026Her001	Haematological	Congenital anaemia	Hereditary Spherocytosis	EUR	Pathogenic
027Maj001	Haematological	Congenital anaemia	Majeed Syndrome	EUR	Pathogenic
032Con002	Haematological	Congenital Erythrocytosis	Congenital Erythrocytosis	EUR	Pathogenic
038Con001	Haematological	Congenital Erythrocytosis	Congenital Erythrocytosis	EUR	Evidence of Causality
035ERY001	Haematological	Congenital Erythrocytosis	Erythrocytosis putative somatic origin	EUR	Unsolved
035VHL001	Haematological	Congenital Erythrocytosis	VHL het cohort	EUR	Unsolved
035VHL002	Haematological	Congenital Erythrocytosis	VHL het cohort	EUR	Unsolved
035VHL003	Haematological	Congenital Erythrocytosis	VHL het cohort	EUR	Unsolved
038VHL001	Haematological	Congenital Erythrocytosis	VHL het cohort	EUR	Pathogenic
038VHL002	Haematological	Congenital Erythrocytosis	VHL het cohort	EUR	Pathogenic
038VHL003	Haematological	Congenital Erythrocytosis	VHL het cohort	EUR	Pathogenic
066NNH001	Haematological	Haemochromatosis	Neonatal Haemochromatosis	EUR	Lead Candidate
008Con001	Immunological	Abnormality of thymus development	Congenital Thymic Stromal Defects	EUR	Pathogenic
008Con002	Immunological	Abnormality of thymus development	Congenital Thymic Stromal Defects	EUR	Lead Candidate
008Con003	Immunological	Abnormality of thymus development	Congenital Thymic Stromal Defects	EUR	Unsolved
008Con004	Immunological	Abnormality of thymus development	Congenital Thymic Stromal Defects	EUR	Lead Candidate
008Con005	Immunological	Abnormality of thymus development	Congenital Thymic Stromal Defects	EUR	Unsolved
018Com001	Immunological	Primary immunodeficiency	Complement Deficiency Disorder	EUR	Unsolved
012Con001	Immunological	Primary immunodeficiency	Congenital Neutropenia and IBD	SAS	Pathogenic
018EBV001	Immunological	Primary immunodeficiency	EBV Viraemia	EUR	Unsolved
036EBV001	Immunological	Primary immunodeficiency	EBV Viraemia	SAS	Unsolved
056ENC001	Immunological	Primary immunodeficiency	Encephalitis	EUR	Evidence of Causality
018Fat001	Immunological	Primary immunodeficiency	Fatal Acute Encephalitis	EUR	Lead Candidate
036GAT001	Immunological	Primary immunodeficiency	GATA2 Deficiency	EUR	Pathogenic
036HLH001	Immunological	Primary immunodeficiency	Hemophagocytic lymphohistiocytosis (HLH)	EUR	Unsolved
016Imm001	Immunological	Primary immunodeficiency	Immunodysregulatory Disorder	EUR	Likely Pathogenic
018Pul001	Immunological	Primary immunodeficiency	Pulmonary infection	AFR	Unsolved
007Cra001	Musculoskeletal	Craniosynostosis	Craniosynostosis	SAS	Evidence of Causality
007Cra002	Musculoskeletal	Craniosynostosis	Craniosynostosis	EUR	Evidence of Causality
007Cra003	Musculoskeletal	Craniosynostosis	Craniosynostosis	AFR	Unsolved
007FAM001	Musculoskeletal	Craniosynostosis	Familial craniosynostosis	EUR	Evidence of Causality
007MAX001	Musculoskeletal	Craniosynostosis	Hereditary maxillary prognathism	SAS	Pathogenic
007SYN001	Musculoskeletal	Craniosynostosis	Syndromic multiple craniosynostosis	EUR	Unsolved
007SYN002	Musculoskeletal	Craniosynostosis	Syndromic multiple craniosynostosis	EUR	Unsolved
065DSA001	Musculoskeletal	Diffuse Skeletal Angiomatosis	Diffuse Skeletal Angiomatosis	EUR	Unsolved
009Dis001	Musculoskeletal	Skeletal muscle disorder	Distal Arthrogryposis	EUR	Pathogenic
010Aic001	Neurological	Congenital brain malformations	Aicardi Syndrome	EUR	Unsolved
010Aic002	Neurological	Congenital brain malformations	Aicardi Syndrome	EUR	Pathogenic
010Aic003	Neurological	Congenital brain malformations	Aicardi Syndrome	EUR	Unsolved
010Aic004	Neurological	Congenital brain malformations	Aicardi Syndrome	AMR,EUR	Unsolved
010Aic005	Neurological	Congenital brain malformations	Aicardi Syndrome	EUR	Unsolved
010Aic006	Neurological	Congenital brain malformations	Aicardi Syndrome	EUR	Unsolved
010Aic007	Neurological	Congenital brain malformations	Aicardi Syndrome	AMR	Unsolved
010AIC009	Neurological	Congenital brain malformations	Aicardi Syndrome	EUR	Unsolved
010AIC010	Neurological	Congenital brain malformations	Aicardi Syndrome	EUR	Unsolved
010AIC011	Neurological	Congenital brain malformations	Aicardi Syndrome	EUR	Unsolved
010AIC012	Neurological	Congenital brain malformations	Aicardi Syndrome	EUR	Unsolved
010AIC013	Neurological	Congenital brain malformations	Aicardi Syndrome	EUR	Unsolved
006Bra001	Neurological	Congenital brain malformations	Brain Abnormality	EUR	Likely Pathogenic
010CCA001	Neurological	Congenital brain malformations	Cortical Cerebellar Atrophy	EUR	Likely Pathogenic
010MCP001	Neurological	Congenital brain malformations	Microcephaly	EUR	Pathogenic
010MCP002	Neurological	Congenital brain malformations	Microcephaly	EUR	Lead Candidate
010Neu001	Neurological	Congenital brain malformations	Neurodevelopmental Disorder	SAS	Pathogenic
010PVN001	Neurological	Congenital brain malformations	Periventricular nodular heterotopia	EUR	Pathogenic
010PI4K001	Neurological	Congenital brain malformations	PI4KA-like foetal congenital abnormalities	EUR	Pathogenic
010PMG001	Neurological	Congenital brain malformations	Polymicrogyria	EUR	Likely Pathogenic
010PMA001	Neurological	Congenital brain malformations	Polymicrogyria and Arthrogryposis	EUR	Pathogenic
010SCH001	Neurological	Congenital brain malformations	Schizencephaly	EUR	Unsolved
010VMA001	Neurological	Congenital brain malformations	Ventriculomegaly and absent corpus callosum	EUR	Unsolved
021ADF001	Neurological	Epilepsy	Autosomal Dominant Nocturnal Frontal Lobe Epilepsy (ADNFLE)	EUR	Unsolved
021Bil001	Neurological	Epilepsy	Bilateral hippocampal sclerosis	EUR	Unsolved
021Bil002	Neurological	Epilepsy	Bilateral hippocampal sclerosis	EUR	Lead Candidate
021Bil003	Neurological	Epilepsy	Bilateral Temporal Lobe Epilepsy	EUR	Unsolved
021Foc001	Neurological	Epilepsy	Focal epilepsy	EUR	Unsolved
021Ref001	Neurological	Epilepsy	Idiopathic Generalised Epilepsy	EUR	Unsolved
021Ref002	Neurological	Epilepsy	Idiopathic Generalised Epilepsy	EUR	Unsolved
021Ref003	Neurological	Epilepsy	Idiopathic Generalised Epilepsy	EUR	Unsolved
021Ref004	Neurological	Epilepsy	Idiopathic Generalised Epilepsy	EUR	Unsolved
021Jea001	Neurological	Epilepsy	Jeavons Syndrome	EUR	Lead Candidate
021mTL001	Neurological	Epilepsy	mTLE - Bilateral Mesial Temporal Lobe Epilepsy	EUR	Lead Candidate
021mTL002	Neurological	Epilepsy	mTLE - Bilateral Mesial Temporal Lobe Epilepsy	EUR	Unsolved
021NOR001	Neurological	Epilepsy	NORSE	EUR	Unsolved
021NOR002	Neurological	Epilepsy	NORSE	EUR	Unsolved
021NOR003	Neurological	Epilepsy	NORSE	EUR	Unsolved
021NOR004	Neurological	Epilepsy	NORSE	EUR	Unsolved
021Per001	Neurological	Epilepsy	Perampanol Extreme Responder (Epilepsy)	EUR	Unsolved
021Pha001	Neurological	Epilepsy	Pharmacoresistant Generalised Epilepsy	EUR	Unsolved
021Pos001	Neurological	Epilepsy	Post-operative Hippocampal Sclerosis	EUR	Unsolved
021Rea001	Neurological	Epilepsy	Reading Epilepsy	EUR	Unsolved
009Sev001	Neurological	Epilepsy	Severe Epileptic Encephalopathy	EUR	Pathogenic
015ILD001	Neurological	Intellectual Learning Disability	Intellectual Learning Disability	EUR	Likely Pathogenic
015ILD002	Neurological	Intellectual Learning Disability	Intellectual Learning Disability	EUR	Pathogenic
020Cha001	Neurological	Neuromuscular disorder	Charcot Marie Tooth (type 2)	EUR	Unsolved
037Con001	Neurological	Neuromuscular disorder	Congenital Myasthenia	SAS	Pathogenic
037Con002	Neurological	Neuromuscular disorder	Congenital Myasthenia	AFR	Evidence of Causality
037Con003	Neurological	Neuromuscular disorder	Congenital Myasthenia	EUR	Pathogenic
037Con005	Neurological	Neuromuscular disorder	Congenital Myasthenia	AMR	Unsolved
020Dem001	Neurological	Neuromuscular disorder	Demyelinating Neuropathy	EUR	Unsolved
006Spa001	Neurological	Neuromuscular disorder	Spastic Paraparesis	EUR	Unsolved
053NET001	Tumour syndrome	Neuroendocrine Tumour	Neuroendocrine Tumour	EUR	Unsolved
010Fin001	Ultra-rare disorders	Skeletal and multi-system anomalies	Fine-Lubinsky Syndrome	SAS	Evidence of Causality
010Fin002	Ultra-rare disorders	Skeletal and multi-system anomalies	Fine-Lubinsky Syndrome	SAS	Likely Pathogenic
010FIN004	Ultra-rare disorders	Skeletal and multi-system anomalies	Fine-Lubinsky Syndrome	SAS	Evidence of Causality
017Fin001	Ultra-rare disorders	Skeletal and multi-system anomalies	Fine-Lubinsky Syndrome	EUR	Lead Candidate
010Kap001	Ultra-rare disorders	Skeletal and multi-system anomalies	Kapur-Toriello Syndrome	EUR	Lead Candidate
005Kli001	Vascular	Capillary malformation disorder	Klippel-Trenaunay-like-Syndrome	EUR	Pathogenic
003Thr001	Vascular	Thrombocytosis	Thrombocytosis	EUR	Unsolved

## Sheet: Table S7_ResultsAllVariant
Case ID	Disease	Variant Type	Gene	Genomic Location (GRCh38)	HGVS	Consequence (most severe)	Inheritance model	Zygosity	CADD phred score	GnomAD AF	Reference PMID	Variant ACMG criteria	Variant ACMG Classification	Case Solved Status (most severe consequence)	Detectable by panels, arrays or exome sequencing?	Reason missed on prior testing	N Sequenced Samples	WGS500 Class	Amino_acids	Codons	LoFtool	EnsGene	Feature	EXON	INTRON	VAR_SYNONYMS from VEP	EVE_CLASS	EVE_SCORE	SpliceAI scores (AG,AL,DG,DL)	MaxEntScan_alt	MaxEntScan_diff	MaxEntScan_ref
007Cra001	Craniosynostosis	SV_DEL	DHRS3	chr1:g.12617576_12621501del	chr1:g.12617576_12621501del	partial LoF	AR	hom				CNV -no criteria applied	CNV -no criteria applied	Evidence of Causality	N	Novel gene for disease, would not have been tested	1	A											NA, NA, NA, NA
010Fin001	Fine-Lubinsky Syndrome	SNV	HDLBP	chr2:g.241248002C>T	ENST00000310931.10:c.1731+1G>A	splice_donor_variant	AR	hom	33			PM2, PP3, PP1	VUS	Evidence of Causality	Y	Novel gene for disease, would not have been tested	2	A			0.461	ENSG00000115677	ENST00000310931.10		14/27				0, 0, 0.18, 0.99	-1.828	8.182	6.354
013Foe001	Foetal Cardiomyopathy	DEL	MCM10	chr10:g.13171149delG	ENST00000378714.7:p.Gly79fs	frameshift_variant	CH	het			PMID 33712616	PVS1, PP1_Strong, PM2	Pathogenic	Pathogenic	Y	Novel gene for disease, would not have been tested	1	A	G/X	Gga/ga	0.937	ENSG00000065328	ENST00000378714.8	3/20					0, 0, 0, 0
013Foe001	Foetal Cardiomyopathy	SNV	MCM10	chr10:g.13175686G>A	ENST00000378714.8:c.764+5G>A	splice_donor_5th_base_variant,intron_variant	CH	het	23.1	6.573e-06	PMID33712616	PS3, PP1_Strong, PM2, PM3	Pathogenic	Pathogenic	Y	Novel gene for disease, would not have been tested	1	A			0.937	ENSG00000065328	ENST00000378714.8		6/19	ClinVar::RCV001391309,VCV001077167--OMIM::609357.0004			0, 0, 0, 0.87	4.055	4.886	8.941
015ILD002	Intellectual Learning Disability	DEL	KMT2E	chr7:g.105109143_105109144delTA	ENST00000311117.7:p.Tyr1224fs	frameshift_variant	AD, DNM	het			PMID 31079897	PVS1, PM2, PS2_Supp	Pathogenic	Pathogenic	Y	Novel gene for disease, would not have been tested	3	A	Y/X	TAt/t		ENSG00000005483	ENST00000311117.8	23/27		ClinVar::RCV000993761,VCV000805933			0, 0, 0, 0
010CCA001	Cortical Cerebellar Atrophy	SNV	POLR2A	chr17:g.7501583C>T	ENST00000617998.4:p.Gln735*	stop_gained	AD, DNM	het	22.2		PMID 31353023	PVS1_Mod, PS2_Mod, PM2	Likely Pathogenic	Likely Pathogenic	Y	Novel gene for disease, would not have been tested	3	A	Q/*	Cag/Tag	0.26	ENSG00000181222	ENST00000674977.2	14/30		ClinVar::RCV000852290,VCV000691499--OMIM::180660.0003			0, 0, 0, 0
007FAM001	Familial craniosynostosis	SV_DEL	FOXD3	chr1:g.63395674_63749319del	chr1:g.63395674_63749319del	~354kb deletion (including EFCAB7) downstream of FOXD3	AD	het				CNV -no criteria applied	CNV -no criteria applied	Evidence of Causality	Y	Novel gene for disease, would not have been tested	2	A											NA, NA, NA, NA
010Aic002	Aicardi Syndrome	SV_DEL	ARX	chrX:g.25013828_25017089del	chrX:g.25013828_25017089del	start_lost	XD, DNM	het				PVS1, PM2, PS2_Supp	Pathogenic	Pathogenic	N	Novel gene for phenotype, would not have been tested	3	B											NA, NA, NA, NA
010Kap001	Kapur-Toriello Syndrome	SNV	BMP4	chr14:g.53951412C>T	ENST00000245451.9:c.370+441G>A	deep intronic	AD, DNM	het	19.28			PM2, BP4	VUS	Lead Candidate	N	Novel gene for phenotype, would not have been tested	3	B			0.237	ENSG00000125378	ENST00000245451.9		3/3				0, 0, 0, 0
013VEN001	Ventricular Fibrillation (Idiopathic)	SNV	RYR2	chr1:g.237784136G>A	ENST00000366574.6:p.Ala4142Thr	missense_variant	AD	het	26.6		PMID 34949103	PP1_Strong, PM2, PM1, PP3	Likely Pathogenic	Likely Pathogenic	Y	Novel gene for phenotype, would not have been tested	2	B	A/T	Gcc/Acc	0.0489	ENSG00000198626	ENST00000366574.7	90/105		ClinVar::RCV001307563,VCV001009997--COSMIC::COSM3689465	Uncertain	0.564363	0, 0, 0, 0
010PMA001	Polymicrogyria and Arthrogryposis	DEL	RMND1	chr6:g.151445704delA	ENST00000367303.8:p.Phe36fs	frameshift_variant	AR	hom				PVS1, PM2	Pathogenic	Pathogenic	Y	Novel gene for phenotype, would not have been tested	4	B	F/X	ttT/tt	0.873	ENSG00000155906	ENST00000444024.3	2/12					0, 0, 0, 0
007MAX001	Hereditary maxillary prognathism	SV_OTHER	KCNJ2 or SOX9	multiple rearrangements		chromothripsis - TAD disruption	AD	het			Chatron et al BioRxiv 2020.07.17.206771	CNV -no criteria applied	CNV -no criteria applied	Pathogenic	N	Complex rearrangement not detectable by array-CGH	2	B											NA, NA, NA, NA
007Cra002	Craniosynostosis	SV_DUP	non_coding_region	chr1:g.63129955_63141504dup	chr1:g.63129955_63141504dup	enhancer	AD	het				CNV -no criteria applied	CNV -no criteria applied	Evidence of Causality	N	Non coding region, not detectable by clinical tests	2	B											NA, NA, NA, NA
005Kli001	Klippel-Trenaunay-like-Syndrome	SNV	PIK3CA	chr3:g.179234297A>G	ENST00000263967.4:p.His1047Arg	missense_variant	Somatic	Somatic	22.5			PS2_Very Strong, PM5, PP2, PS3_Mod	Pathogenic	Pathogenic	Y	Clinician suspicion initially for a germline variant	3	C	H/R	cAt/cGt	0.268	ENSG00000121879	ENST00000263967.4	21/21		ClinVar::RCV000709691,RCV000487449,RCV000443546,RCV000442736,RCV000442731,RCV000442164,RCV000438435,RCV000437782,RCV000437287,RCV000437153,RCV000436234,RCV000433127,RCV000432543,RCV000432506,RCV000431232,RCV000430589,RCV000428372,RCV000426614,RCV000426498,RCV000425956,RCV000422442,RCV000421855,RCV000421225,RCV000420562,RCV000419938,RCV000154516,RCV000201231,RCV000014628,RCV000014627,RCV000014626,…	Benign	0.358401	0, 0, 0, 0
006Bra001	Brain Abnormality	SNV	TUBA1A	chr12:g.49185098T>C	ENST00000301071.11:p.Glu423Gly	missense_variant	AD, DNM	het	28.1			PS2_Mod, PM2, PP2, PP3	Likely Pathogenic	Likely Pathogenic	Y	Heterogeneous condition and referred to expedite analysis and avoid sequential panel-based testing.	3	C	E/G	gAg/gGg	0.278	ENSG00000167552	ENST00000301071.12	4/4					0, 0, 0, 0
008Con001	Congenital Thymic Stromal Defects	SNV	FOXN1	chr17:g.28534940CA>C	ENST00000579795.5:p.His457fs	frameshift_variant	AD	het			PMID: 34860543	PS4, PS3, PM2	Pathogenic	Pathogenic	Y	Atypical inheritance pattern for gene	4	C	H/X	cAc/cc	0.0592	ENSG00000109101	ENST00000579795.6	8/9					0.06, 0, 0, 0
009Dis001	Distal Arthrogryposis	SNV	TNNI2	chr11:g.1841468C>T	ENST00000381911.5:p.Arg156*	stop_gained	AD	het	43			PS4, PP1_Mod, PM2, PS3_Supp, PS2_Supp	Pathogenic	Pathogenic	Y	Heterogeneous condition and referred to expedite analysis and avoid sequential panel-based testing.	1	C	R/*	Cga/Tga	0.128	ENSG00000130598	ENST00000381911.6	8/8		ClinVar::RCV000415208,RCV000128665,RCV000013249,VCV000012436--LMDD::TNNI2_00003--OMIM::191043.0002--PhenCode::TNNI2:c.466C>T--COSMIC::COSM9006387			0, 0, 0, 0
009Sev001	Severe Epileptic Encephalopathy	INS	WWOX	chr16:g.78424965_78424966insG	ENST00000566780.5:p.His236fs	frameshift_variant	CH	hom			PMID: 30356099	PVS1, PM2, PM3	Pathogenic	Pathogenic	Y	Gene not incorporated into validated panel test at the time of referral	1	C	L/LX	ctg/ctGg	0.304	ENSG00000186153	ENST00000566780.6	7/9		ClinVar::RCV000989641,VCV000803276			0, 0, 0, 0
009Sev001	Severe Epileptic Encephalopathy	SV_DEL	WWOX	chr16:g.78291861_78511176del	chr16:g.78291861_78511176del	inframe_deletion	CH	het			PMID: 30356099	PVS1, PM2, PM3	Pathogenic	Pathogenic	Y	Gene not incorporated into validated panel test at the time of referral	1	C											NA, NA, NA, NA
010Fin002	Fine-Lubinsky Syndrome	SNV	POR	chr7:g.75985673G>C	ENST00000461988.5:p.Arg498Pro	missense_variant	AR	hom	22.3			PS3_Mod, PS4_Mod, PM2	Likely Pathogenic	Likely Pathogenic	Y	Differential diagnosis pursued. Appropriate gene panel not selected	3	C	R/P	cGg/cCg	0.329	ENSG00000127948	ENST00000461988.6	13/16		COSMIC::COSM9696476			0, 0, 0, 0
010Neu001	Neurodevelopmental Disorder	SV_DUP	PDK3, PCYT1B, insertion downstream SOX3	chrX:g.24321648_24954644dup,chrX:g.140297721_140400415dup		gene_duplication	XR	hemi				CNV -no criteria applied	CNV -no criteria applied	Pathogenic	N	Positional resolution not possible from prior standard of care testing	1	C											NA, NA, NA, NA
012Con001	Congenital Neutropenia and IBD	INS	G6PC3	chr17:g.44075907_44075908insC	ENST00000269097.8:p.Gln305fs	frameshift_variant	AR	hom			PMID: 31157858	PVS1, PS4_Mod, PM2	Pathogenic	Pathogenic	Y	Non-classical presentation and significant genetic heterogeneity with extended phenotype. Referred to expedite analysis and avoid the sequential panel-based testing offered at the time.	3	C	H/HX	cac/caCc	0.726	ENSG00000141349	ENST00000269097.9	6/6		ClinVar::RCV001027572,VCV000827706			0, 0, 0, 0
013Chi001	Childhood dilated cardiomyopathy	SNV	ACTC1	chr15:g.34792234C>T	ENST00000290378.4:p.Ala222Thr	missense_variant	AD, DNM	het	29.1			PS2_Mod, PM2, PP2, PP3	Likely Pathogenic	Likely Pathogenic	Y	At the time, all appropriate targeted gene panels had been undertaken.	3	C	A/T	Gcc/Acc	0.106	ENSG00000159251	ENST00000290378.6	5/7		ClinVar::RCV000513489,VCV000444338--COSMIC::COSM960880	Uncertain	0.455589	0, 0, 0, 0
015ILD001	Intellectual Learning Disability	SNV	DOCK7	chr1:g.62476066C>A	ENST00000635253.2:c.5724+1G>T	splice_donor_variant	AR	hom	34			PVS1_Strong, PM2	Likely Pathogenic	Likely Pathogenic	Y	At the time, all appropriate targeted gene panels had been undertaken.	3	C			0.776	ENSG00000116641	ENST00000635253.2		45/49	COSMIC::COSM9563653			0, 0, 0.04, 1	-0.521	8.504	7.983
016Imm001	Immunodysregulatory Disorder	SNV	SAMD9L	chr7:g.93134896C>T	ENST00000318238.8:p.Arg359Gln	missense_variant	AD, DNM	het	8.895	6.574e-06	PMID: 31015479	PS2, BS1, PP4	VUS	Likely Pathogenic	Y	At the time, all appropriate targeted gene panels had been undertaken.	3	C	R/Q	cGg/cAg		ENSG00000177409	ENST00000318238.9	5/5		ClinVar::RCV001968731,VCV001467903--COSMIC::COSM5046496			0, 0, 0, 0
016Imm001	Immunodysregulatory Disorder	SNV	SAMD9L	chr7:g.93132619T>C	ENST00000318238.8:p.Tyr1118Cys	missense_variant	AD, DNM	het	24.9		PMID: 31015479	PS2, PM2, PP4	Likely Pathogenic	Likely Pathogenic	Y	At the time, all appropriate targeted gene panels had been undertaken.	3	C	Y/C	tAt/tGt		ENSG00000177409	ENST00000318238.9	5/5		ClinVar::RCV001816820,RCV000762458,VCV000624284	Pathogenic	0.801459	0, 0, 0, 0
023Her001	Hereditary Spherocytosis	DEL	ANK1	chr8:g.41690564_41690565delAG	ENST00000289734.11:p.Ser1298fs	frameshift_variant	AD	het				PVS1, PM2	Pathogenic	Pathogenic	Y	Low coverage of gene on SOC panel test at time of testing	3	C	S/X	tCT/t	0.109	ENSG00000029534	ENST00000289734.13	32/43					0, 0, 0, 0
026Her001	Hereditary Spherocytosis	SNV	SEC23B	chr20:g.18510875C>T	ENST00000650089.1:p.Arg14Trp	missense_variant	CH	het	27.1	0.0001775		PMS_Very strong, PS3_Supp, PP3	Pathogenic	Pathogenic	Y	Differential diagnosis pursued. Appropriate gene panel not selected	4	C	R/W	Cgg/Tgg	0.12	ENSG00000101310	ENST00000650089.1	2/20		ClinVar::RCV000001282,VCV000001223,RCV000153924,RCV000688744,RCV001287186--OMIM::610512.0002--UniProt::VAR_062294--COSMIC::COSM9344897	Pathogenic	0.670329	0, 0, 0, 0
026Her001	Hereditary Spherocytosis	SNV	SEC23B	chr20:g.18543003A>G	ENST00000650089.1:c.1512-16A>G	splice_polypyrimidine_tract_variant,intron_variant	CH	het	22.4	1.973e-05		PM3, PP3	VUS-tepid	Pathogenic	N	Differential diagnosis pursued. Appropriate gene panel not selected	4	C			0.12	ENSG00000101310	ENST00000650089.1		13/19				0, 0.54, 0, 0	1.164	0.68	1.844
027Maj001	Majeed Syndrome	SNV	PSTPIP1	chr15:g.77032304G>A	ENST00000558012.5:p.Glu250Lys	missense_variant	AD, DNM	het	29.4			PS2_Very strong, PS4, PM2, PP1_Mod, PS3_Supp	Pathogenic	Pathogenic	Y	Differential diagnosis pursued. Appropriate gene panel not selected	3	C	E/K	Gag/Aag	0.794	ENSG00000140368	ENST00000558012.6	11/15		ClinVar::RCV001198342,RCV000215780,RCV000084063,VCV000097810,RCV000004684,VCV000004434--Infevers::565--OMIM::606347.0001--UniProt::VAR_023523--COSMIC::COSM10066504	Pathogenic	0.743795	0.01, 0, 0, 0
032Con002	Congenital Erythrocytosis	SNV	VHL	chr3:g.10143003A>C	ENST00000256474.3:c.340+816A>C	deep intronic	AR	hom	11.96	6.569e-06	PMID: 29891534	PM2, PM3_Supp, PS3_Supp, PP4	VUS-hot	Pathogenic	N	Deep intronic variant not covered by standard of care testing	3	C			0.0364	ENSG00000134086	ENST00000256474.3		1/2	ClinVar::RCV001050041,VCV000846679			0.09, 0, 0.42, 0
035VHL001	VHL het cohort	SNV	VHL	chr3:g.10149921C>T	ENST00000256474.2:p.Arg200Trp	missense_variant	CH	het	29.5	8.543e-05		PS4, PM1, PM2, PP3, PP4	Pathogenic	Unsolved	Y	Referred for second hit identification	1	C	R/W	Cgg/Tgg	0.0364	ENSG00000134086	ENST00000256474.3	3/3		ClinVar::RCV000627742,RCV000574264,RCV000161094,RCV000148922,RCV000122262,RCV000722031,RCV000002320,VCV000002232--OMIM::608537.0019--UniProt::VAR_005779--COSMIC::COSM18024--COSMIC::COSM4770544	Uncertain	0.429597	0, 0, 0, 0
035VHL001	VHL het cohort	SNV	VHL	chr3:g.10142835T>C	ENST00000256474.2:c.340+648T>C	intron_variant	CH	het	6.582	0.009538		BS1, BP4	Likely benign	Unsolved	N	Deep intronic variant not covered by standard of care testing	1	C			0.0364	ENSG00000134086	ENST00000256474.3		1/2	ClinVar::RCV001007628,VCV000816687,RCV001785769,VCV000827583,RCV001516863			0, 0, 0, 0
035VHL002	VHL het cohort	SNV	VHL	chr3:g.10142835T>C	ENST00000256474.2:c.340+648T>C	intron_variant	AR	het	6.582	0.009538		BS1, BP4	Likely benign	Unsolved	N	Deep intronic variant not covered by standard of care testing	1	C			0.0364	ENSG00000134086	ENST00000256474.3		1/2	ClinVar::RCV001007628,VCV000816687,RCV001785769,VCV000827583,RCV001516863			0, 0, 0, 0
035VHL003	VHL het cohort	SNV	VHL	chr3:g.10149921C>T	ENST00000256474.2:p.Arg200Trp	missense_variant	CH	het	29.5	8.543e-05		PS4, PM1, PM2, PP3, PP4	Pathogenic	Unsolved	Y	Referred for second hit identification	1	C	R/W	Cgg/Tgg	0.0364	ENSG00000134086	ENST00000256474.3	3/3		ClinVar::RCV000627742,RCV000574264,RCV000161094,RCV000148922,RCV000122262,RCV000722031,RCV000002320,VCV000002232--OMIM::608537.0019--UniProt::VAR_005779--COSMIC::COSM18024--COSMIC::COSM4770544	Uncertain	0.429597	0, 0, 0, 0
036GAT001	GATA2 Deficiency	SNV	GATA2	chr3:g.128483868G>A	ENST00000341105.6:p.Arg337*	stop_gained	AD, DNM	het	39			PVS1, PS2, PS4_Mod, PM2	Pathogenic	Pathogenic	Y	Variant identified but patient referred for other unexplained elements of phenotype	3	C	R/*	Cga/Tga		ENSG00000179348	ENST00000341105.7	4/6		ClinVar::RCV000022571,VCV000029719,RCV000812052,RCV000984812,RCV001342280,VCV001038904,RCV001542112--OMIM::137295.0011--COSMIC::COSM6022403			0, 0, 0.06, 0
036GAT001	GATA2 Deficiency	SNV	TYR	chr11:g.89178050A>G	ENST00000263321.5:p.Lys33Glu	missense_variant	CH	het	24			PM1, PM2, PM3, PM5, PP3	Likely Pathogenic	Pathogenic	Y	Differential diagnosis pursued. Appropriate gene panel not selected	3	C	K/E	Aag/Gag	0.0937	ENSG00000077498	ENST00000263321.6	1/5			Pathogenic	0.732558	0, 0, 0, 0
036GAT001	GATA2 Deficiency	SNV	TYR	chr11:g.89284924G>A	ENST00000263321.5:p.Gly446Ser	missense_variant	CH	het	27.7	0.0001121		PM3_VeryStrong, PM2_Mod, PP3_Supp	Pathogenic	Pathogenic	Y	Differential diagnosis pursued. Appropriate gene panel not selected	3	C	G/S	Ggc/Agc	0.0937	ENSG00000077498	ENST00000263321.6	4/5		ClinVar::RCV000602413,RCV000085920,RCV000004005,VCV000003801--OMIM::606933.0031--PhenCode::RISN_TYR:c.1336G>A--UniProt::VAR_007692	Pathogenic	0.845042	0, 0, 0, 0
037Con001	Congenital Myasthenia	SNV	CHRNE	chr17:g.4902268A>G	ENST00000293780.4:p.Leu98Pro	missense_variant	AR	hom	25.7			PS3_Strong, PM3_Strong, PM2, PP3	Pathogenic	Pathogenic	Y	Differential diagnosis pursued. Appropriate gene panel not selected	1	C	L/P	cTg/cCg	0.16	ENSG00000108556	ENST00000649488.2	4/12		ClinVar::RCV001771872,RCV000641732,VCV000534249--UniProt::VAR_019567	Pathogenic	0.668567	0, 0, 0, 0
037Con002	Congenital Myasthenia	SNV	SLC5A7	chr2:g.107992999G>A	ENST00000264047.2:p.Arg107His	missense_variant	AR	hom	29.9	1.972e-05	PMID: 33250374	PM2, PP3, PP4	VUS-Warm	Evidence of Causality	Y	Discovery commensurate with original publication of this gene so would not have been tested	1	C	R/H	cGt/cAt		ENSG00000115665	ENST00000264047.3	4/9		COSMIC::COSM8522155	Uncertain	0.589317	0, 0, 0, 0
037Con003	Congenital Myasthenia	SNV	CHRNE	chr17:g.4902010G>A	ENST00000293780.4:p.Pro141Leu	missense_variant	CH	het	27.9	1.314e-05		PM3_Strong, PS3, PM2, PP3	Pathogenic	Pathogenic	Y	Test sensitivity issues within separate laboratory prescreen, prior to standard of care referral	1	C	P/L	cCg/cTg	0.16	ENSG00000108556	ENST00000649488.2	5/12		ClinVar::RCV000691820,RCV000020014,VCV000018346--OMIM::100725.0003--UniProt::VAR_000289--COSMIC::COSM3370784	Uncertain	0.628576	0.01, 0, 0, 0
037Con003	Congenital Myasthenia	SNV	CHRNE	chr17:g.4899467C>G	ENST00000649488.2:c.1032+1G>C	splice_donor_variant	CH	het	33			PVS1, PM2, PM3	Pathogenic	Pathogenic	Y	De novo splice variant. Consanguineous family so expected recessive inheritance	1	C			0.16	ENSG00000108556	ENST00000649488.2		9/11				0, 0, 0.04, 0.99	-1.696	8.273	6.577
038Con001	Congenital Erythrocytosis	SNV	SLC30A10	chr1:g.219918390A>T	ENST00000366926.3:p.Trp275Arg	missense_variant	AR	hom	28			PM2, PP3, PP4	VUS-Warm	Evidence of Causality	Y	Referred for second hit identification	3	C	W/R	Tgg/Agg	0.0689	ENSG00000196660	ENST00000366926.4	3/4		COSMIC::COSM6781427	Pathogenic	0.877562	0.01, 0, 0, 0
038VHL001	VHL het cohort	SNV	VHL	chr3:g.10142957T>C	ENST00000256474.3:c.340+770T>C	deep intronic	CH	het	5.828	1.315e-05	PMID: 29891534	PS3, PM2, PM3_Strong, PP4	Pathogenic	Pathogenic	N	Deep intronic variant not covered by standard of care testing	1	C			0.0364	ENSG00000134086	ENST00000256474.3		1/2	ClinVar::RCV001238805,RCV001007626,VCV000816685,RCV001052187,VCV000848432--OMIM::608537.0030			0, 0, 0, 0
038VHL001	VHL het cohort	SNV	VHL	chr3:g.10149921C>T	ENST00000256474.2:p.Arg200Trp	missense_variant	CH	het	29.5	8.543e-05		PS4, PM1, PM2, PP3, PP4	Pathogenic	Pathogenic	Y	Referred for second hit identification	1	C	R/W	Cgg/Tgg	0.0364	ENSG00000134086	ENST00000256474.3	3/3		ClinVar::RCV000627742,RCV000574264,RCV000161094,RCV000148922,RCV000122262,RCV000722031,RCV000002320,VCV000002232--OMIM::608537.0019--UniProt::VAR_005779--COSMIC::COSM18024--COSMIC::COSM4770544	Uncertain	0.429597	0, 0, 0, 0
038VHL002	VHL het cohort	SNV	VHL	chr3:g.10142957T>C	ENST00000256474.3:c.340+770T>C	deep intronic	CH	het	5.828	1.315e-05	PMID: 29891534	PS3, PM2, PM3_Strong, PP4	Pathogenic	Pathogenic	N	Deep intronic variant not covered by standard of care testing	1	C			0.0364	ENSG00000134086	ENST00000256474.3		1/2	ClinVar::RCV001238805,RCV001007626,VCV000816685,RCV001052187,VCV000848432--OMIM::608537.0030			0, 0, 0, 0
038VHL002	VHL het cohort	SNV	VHL	chr3:g.10149921C>T	ENST00000256474.2:p.Arg200Trp	missense_variant	CH	het	29.5	8.543e-05		PS4, PM1, PM2, PP3, PP4	Pathogenic	Pathogenic	Y	Referred for second hit identification	1	C	R/W	Cgg/Tgg	0.0364	ENSG00000134086	ENST00000256474.3	3/3		ClinVar::RCV000627742,RCV000574264,RCV000161094,RCV000148922,RCV000122262,RCV000722031,RCV000002320,VCV000002232--OMIM::608537.0019--UniProt::VAR_005779--COSMIC::COSM18024--COSMIC::COSM4770544	Uncertain	0.429597	0, 0, 0, 0
038VHL003	VHL het cohort	SNV	VHL	chr3:g.10142957T>C	ENST00000256474.3:c.340+770T>C	deep intronic	CH	het	5.828	1.315e-05	PMID: 29891534	PS3, PM2, PM3_Strong, PP4	Pathogenic	Pathogenic	N	Deep intronic variant not covered by standard of care testing	1	C			0.0364	ENSG00000134086	ENST00000256474.3		1/2	ClinVar::RCV001238805,RCV001007626,VCV000816685,RCV001052187,VCV000848432--OMIM::608537.0030			0, 0, 0, 0
038VHL003	VHL het cohort	SNV	VHL	chr3:g.10149921C>T	ENST00000256474.2:p.Arg200Trp	missense_variant	CH	het	29.5	8.543e-05		PS4, PM1, PM2, PP3, PP4	Pathogenic	Pathogenic	Y	Referred for second hit identification	1	C	R/W	Cgg/Tgg	0.0364	ENSG00000134086	ENST00000256474.3	3/3		ClinVar::RCV000627742,RCV000574264,RCV000161094,RCV000148922,RCV000122262,RCV000722031,RCV000002320,VCV000002232--OMIM::608537.0019--UniProt::VAR_005779--COSMIC::COSM18024--COSMIC::COSM4770544	Uncertain	0.429597	0, 0, 0, 0
039Fib001	Fibrotic KD	SNV	NPHP3	chr3:g.132684702A>G	ENST00000337331.9:p.Leu1141Pro	missense_variant	CH	het	30	6.571e-06		PM2, PP1_Mod, PP3, PP4	Likely Pathogenic	Likely Pathogenic	Y	Transplantation needed and heterogeneous condition; referred to expedite analysis and avoid the sequential panel- based testing offered at the time.	5	C	L/P	cTg/cCg	0.153	ENSG00000113971	ENST00000337331.10	24/27		ClinVar::RCV001318647,RCV000434888,VCV000381594--UniProt::VAR_022818	Pathogenic	0.72349	0.02, 0, 0, 0
039Fib001	Fibrotic KD	SNV	NPHP3	chr3:g.132701460C>T	ENST00000337331.9:p.Gly533Asp	missense_variant	CH	het	25.8			PM2, PM3, PP1_Mod, PP3	Likely Pathogenic	Likely Pathogenic	Y	Transplantation needed and heterogeneous condition; referred to expedite analysis and avoid the sequential panel- based testing offered at the time.	5	C	G/D	gGt/gAt	0.153	ENSG00000113971	ENST00000337331.10	10/27			Pathogenic	0.718511	0, 0, 0, 0
039Hyp001	Hypokalaemia	SNV	SLC4A1	chr17:g.44253241G>A	ENST00000262418.10:p.Arg730Cys	missense_variant	AD	het	27.5			PS3_Strong, PS4_Supp PM2, PP3	Likely Pathogenic	Likely Pathogenic	Y	Variant not covered in standard of care testing at the time of referral (hotspot mutations only)	2	C	R/C	Cgt/Tgt	0.16	ENSG00000004939	ENST00000262418.12	17/20		ClinVar::VCV001163105,RCV001507894	Pathogenic	0.88786	0.01, 0, 0, 0
056ENC001	Encephalitis	SNV	CFI	chr4:g.109766691G>A	ENST00000394634.6:p.Pro64Leu	missense_variant	CH	het	26.4	6.574e-05	PMID: 31231365	PM2, PP3	VUS-Tepid	Evidence of Causality	Y	Non classical presentation of CFI	2	C	P/L	cCg/cTg	0.157	ENSG00000205403	ENST00000394634.7	2/13		UniProt::VAR_063665	Pathogenic	0.85396	0, 0, 0, 0
056ENC001	Encephalitis	SNV	CFI	chr4:g.109766620G>T	ENST00000394634.6:p.Gln88Lys	missense_variant	CH	het	22.1		PMID: 31231365	PM2	VUS-Cool	Evidence of Causality	Y	Non classical presentation of CFI	2	C	Q/K	Caa/Aaa	0.157	ENSG00000205403	ENST00000394634.7	2/13			Uncertain	0.621518	0, 0, 0, 0
058FJHN001	Familial juvenile hyperuricemic nephropathy	SNV	PAX2	chr10:g.100750707G>C	ENST00000355243.7:p.Gly76Arg	missense_variant	AD	het	32		PMID: 32776440	PP1_Strong, PM2, PP3, PM5_Supp	Likely Pathogenic	Likely Pathogenic	Y	Standard of care testing for FJHN at time of referral included UMOD and REN - both negative. Unusual presentation	2	C	G/R	Ggc/Cgc	0.0842	ENSG00000075891	ENST00000355243.8	3/10		ClinVar::RCV000014810,VCV000013799,RCV000788556,VCV000636659--OMIM::167409.0006--UniProt::VAR_003789	Pathogenic	0.979067	0, 0, 0, 0
010PI4K001	PI4KA-like foetal congenital abnormalities	SNV	KIF5C	chr2:g.148947019A>G	ENST00000435030.5:p.Glu237Gly	missense_variant	AD, DNM	het	28.9			PS2_Supp, PM2, PP3, PM5	Likely Pathogenic	Pathogenic	Y	Heterogeneous condition and referred to expedite analysis and avoid the sequential panel- based testing offered at the time.	3	C	E/G	gAa/gGa		ENSG00000168280	ENST00000435030.6	8/26			Uncertain	0.578754	0, 0, 0, 0.08
010PI4K001	PI4KA-like foetal congenital abnormalities	SNV	WDFY3	chr4:g.84809886C>T	ENST00000295888.9:c.2345+1G>A	splice_donor_variant	AD, DNM	het	33			PVS1, PM2	Pathogenic	Pathogenic	Y	Heterogeneous condition and referred to expedite analysis and avoid the sequential panel- based testing offered at the time.	3	C			0.279	ENSG00000163625	ENST00000295888.9		14/67				0, 0, 0.02, 0.57	1.803	8.182	9.985
010MCP001	Microcephaly	DEL	RTTN	chr18:g.70140098_70140100delACC	ENST00000255674.10:p.Val891fs	splice_donor_variant,coding_sequence_variant	CH	het				PVS1, PM2	Pathogenic	Pathogenic	Y	Heterogeneous condition and referred to expedite analysis and avoid the sequential panel- based testing offered at the time.	3	C			0.931	ENSG00000176225	ENST00000640769.2	20/49	20/48				0.01, 0, 0, 0.91
010MCP001	Microcephaly	SNV	RTTN	chr18:g.70145778C>T	ENST00000255674.10:p.Arg772His	missense_variant	CH	het	25.3	1.315e-05		PM2, PM3_Strong	Likely Pathogenic	Pathogenic	Y	Heterogeneous condition and referred to expedite analysis and avoid the sequential panel- based testing offered at the time.	3	C	R/H	cGt/cAt	0.931	ENSG00000176225	ENST00000640769.2	18/49		COSMIC::COSM1224383	Pathogenic	0.788637	0.04, 0.01, 0, 0
010PMG001	Polymicrogyria	SNV	TUBB2B	chr6:g.3224950C>T	ENST00000259818.8:p.Arg380His	missense_variant	AD, DNM	het	25.1			PS2_Supp, PM2, PM5, PP3	Likely Pathogenic	Likely Pathogenic	N	Heterogeneous condition and referred to expedite analysis and avoid the sequential panel- based testing offered at the time.	3	C	R/H	cGc/cAc		ENSG00000137285	ENST00000259818.8	4/4		ClinVar::RCV000147833,VCV000160177	Pathogenic	0.869673	0, 0, 0, 0
010PVN001	Periventricular nodular heterotopia	INS	FLNA	chrX:g.154349655_154349656insT	ENST00000369850.7:p.Val2516fs	frameshift_variant	XD, DNM	het				PVS1, PM2	Pathogenic	Pathogenic	Y	Differential diagnosis pursued. Appropriate gene panel not selected	3	C	-/X	-/A	0.000896	ENSG00000196924	ENST00000369850.10	46/48					0, 0, 0.02, 0
010FIN004	Fine-Lubinsky Syndrome	SNV	SLC39A13	chr11:g.47413633G>C	ENST00000362021.8:p.Asp228His	missense_variant	AR	hom	29.8			PM2	VUS-Cool	Evidence of Causality	Y	Differential diagnosis pursued. Appropriate gene panel not selected	4	C	D/H	Gat/Cat	0.656	ENSG00000165915	ENST00000362021.9	6/10			Uncertain	0.364471	0, 0, 0, 0
066NNC002	Neonatal Cholestasis with mild biliary changes and splenomegaly	SNV	ATP8B1	chr18:g.57652705G>A	ENST00000283684.8:p.Arg1014*	stop_gained	AD, DNM	het	47			PVS1, PM2, PM3_Supp	Pathogenic	Pathogenic	Y	Prior testing investigated compound heterozygous variants, not de novo	3	C	R/*	Cga/Tga	0.317	ENSG00000081923	ENST00000648908.2	25/28		ClinVar::RCV001733627,VCV001301678--COSMIC::COSM5044679			0, 0.02, 0, 0
066NNC002	Neonatal Cholestasis with mild biliary changes and splenomegaly	SNV	ATP8B1	chr18:g.57655325T>C	ENST00000283684.8:p.Arg934Gly	missense_variant	CH	het	27.3			PM2, PM3, PP3, PP4	Likely Pathogenic	Pathogenic	Y	Variant identified by prior SOC testing, second hit sought from WGS	3	C	R/G	Agg/Ggg	0.317	ENSG00000081923	ENST00000648908.2	23/28			Pathogenic	0.885904	0.01, 0, 0, 0
066GCD001	Genetic Cholestatic Disease and Biliary Fibrosis	SNV	ABCB4	chr7:g.87423917C>A	ENST00000649586.2:p.Glu734*	stop_gained	CH	het	40			PVS1, PM2	Pathogenic	Pathogenic	Y	Referred for second hit identification	3	C	E/*	Gag/Tag	0.0172	ENSG00000005471	ENST00000649586.2	17/28					0, 0, 0, 0.19
066GCD001	Genetic Cholestatic Disease and Biliary Fibrosis	SNV	ABCB4	chr7:g.87472595T>C	ENST00000649586.2:c.135+26A>G	non-canonical splice variant	CH	het	15.09	6.57e-06		PM2, PM3, PM4 or PS3_Mod	Likely Pathogenic	Pathogenic	N	Deep intronic variant not covered in standard of care testing	3	C			0.0172	ENSG00000005471	ENST00000649586.2		3/27				0, 0, 0.64, 0.02
058FANC001	Nephrocalcinosis, hypercalciuria and hypercalcaemia	SNV	SLC34A1	chr5:g.177396730C>A	ENST00000324417.6:c.1175-3C>A	splice_region_variant,splice_polypyrimidine_tract_variant,intron_variant	CH	het	24			PS3_Mod, PM2, PM3	Likely Pathogenic	Pathogenic	Y	Heterogeneous condition and referred to expedite analysis and avoid the sequential panel- based testing offered at the time.	3	C			0.363	ENSG00000131183	ENST00000324417.6		10/12				0.48, 0.82, 0, 0	3.172	4.44	7.612
058FANC001	Nephrocalcinosis, hypercalciuria and hypercalcaemia	INS	SLC34A1	chr5:g.177386116_177386117insG	ENST00000324417.5:p.Glu81fs	frameshift_variant	CH	het	32	6.571e-06		PVS1, PM2	Pathogenic	Pathogenic	Y	Gene not incorporated into validated panel test at the time of referral	3	C	L/LX	ctg/ctGg	0.363	ENSG00000131183	ENST00000324417.6	3/13		ClinVar::RCV001972693,VCV001457675			0, 0, 0, 0.08
023Une001	Congenital dyserythropoietic anaemia	SNV	UBE2Q2	chr15:g.75885717G>A	ENST00000267938.9:c.884+2293G>A	intron_variant	AD, DNM	het	0.235			PM2	VUS	Lead Candidate	N	Novel candidate gene for disease, would not have been tested	3	D			0.366	ENSG00000140367	ENST00000267938.9		9/12				0, 0, 0.2, 0
003Neo001	Neonatal cardiomyopathy	SNV	NTRK3	chr15:g.88184270G>A	ENST00000394480.6:p.Thr93Met	missense_variant	AD	see_WES_data	23.2	4.809e-05		BS1_Supp, PP3, PS3_Supp	VUS	Lead Candidate	Y	Gene not incorporated into validated panel test at the time of referral	1	D	T/M	aCg/aTg	0.0394	ENSG00000140538	ENST00000629765.3	4/20		UniProt::VAR_074603--COSMIC::COSM5850005--COSMIC::COSM6555205			0, 0, 0, 0
008Con002	Severe Combined Immunodeficiency	SNV	KDM2B	chr12:g.121441213C>G	ENST00000377071.8:p.Trp1102Ser	missense_variant	AD, DNM	het	29.5			PM2	VUS	Lead Candidate	Y	Novel candidate gene for disease, would not have been tested	3	D	W/S	tGg/tCg	0.628	ENSG00000089094	ENST00000377071.9	20/23					0, 0, 0, 0
008Con004	Severe Combined Immunodeficiency	SNV	INPP5D	chr2:g.233163905T>C	ENST00000445964.6:c.1437+2T>C	splice_donor_variant	AD, DNM	het	32			PM2, PP3	VUS	Lead Candidate	Y	Novel candidate gene for disease, would not have been tested	3	D				ENSG00000168918	ENST00000445964.6		12/26				0, 0, 0.88, 0.98	-3.064	7.754	4.69
008Con004	Severe Combined Immunodeficiency	SNV	VDAC2	chr10:g.75222254A>G	ENST00000332211.10:p.Asn196Ser	missense_variant, non canonical splice site	AD, DNM	het	24.7	1.314e-05		PM2, PP3	VUS	Lead Candidate	Y	Novel candidate gene for disease, would not have been tested	3	D	N/S	aAt/aGt	0.426	ENSG00000165637	ENST00000332211.11	8/10					0.96, 0, 0, 0	4.113	0.555	4.668
017Fin001	Fine-Lubinsky Syndrome	SNV	LANCL3	chrX:g.37572031C>T	ENST00000378619.3:p.Ala54Val	missense_variant	XR, DNM	hom	15.65			PM2, BP4	VUS	Lead Candidate	Y	Novel candidate gene for disease, would not have been tested	3	D
018Fat001	Fatal Acute Encephalitis	MNV	DOCK11	chrX:g.118584817_118584818delinsGT	ENST00000276202.8:p.Ser560Val	missense_variant	XL?	hom				No criteria applied	No criteria applied	Lead Candidate	Y	Novel candidate gene for disease, would not have been tested	4	D											NA, NA, NA, NA
020Cha001	Charcot Marie Tooth (type 2)	DEL	DST	chr6:g.56552205_56552208delATTA	ENST00000370788.6:p.Asn3232fs,ENST00000312431.10:p.Asn3272fs,ENST00000421834.6:p.Asn3232fs,ENST00000361203.7:p.Asn5318fs,ENST00000244364.10:p.Asn2906fs	frameshift_variant	AD, DNM	het				PVS1, PM2	Pathogenic	Unsolved	Y	Differential diagnosis pursued. Appropriate gene panel not selected	3	D	IN/X	atTAAT/at	0.554	ENSG00000151914	ENST00000680361.1	61/104					0, 0, 0, 0.01
021Bil002	Bilateral hippocampal sclerosis	SNV	ALG13	chrX:g.111736808G>A	ENST00000394780.7:p.Ser875Asn	missense_variant	XD	hom	0.255			PM2	VUS	Lead Candidate	Y	Gene not incorporated into validated panel test at the time of referral	3	D	S/N	aGt/aAt	0.273	ENSG00000101901	ENST00000394780.8	23/27		ClinVar::RCV002200337,VCV001558934,RCV001339089,VCV001036132--COSMIC::COSM7319265	Benign	0.167351	NA, NA, NA, NA
021Jea001	Jeavons Syndrome	SNV	PLPPR5	chr1:g.98956630G>A	ENST00000263177.4:p.Arg117Cys	missense_variant	CH	het	28.9	0.0001118		No criteria applied	VUS	Lead Candidate	Y	Novel candidate gene for disease, would not have been tested	4	D
021Jea001	Jeavons Syndrome	SNV	PLPPR5	chr1:g.99004635G>A	ENST00000263177.4:p.Leu13Phe	missense_variant	CH	het	23.1	1.972e-05		PM2, BP4	VUS	Lead Candidate	Y	Novel candidate gene for disease, would not have been tested	4	D
027Con001	Congenital dyserythropoietic anaemia	SNV	COG7	chr16:g.23406239T>C	ENST00000307149.9:p.Tyr500Cys	missense_variant	AR	hom	24.4	0.0002169		No criteria applied	VUS	Unsolved	Y	Differential diagnosis pursued. Appropriate gene panel not selected	1	D	Y/C	tAt/tGt	0.743	ENSG00000168434	ENST00000307149.10	12/17		ClinVar::RCV001320112,VCV001020522	Uncertain	0.474266	0, 0, 0, 0
023CDA001	Congenital dyserythropoietic anaemia	SNV	IRAK4	chr12:g.43768197A>C	ENST00000613694.4:p.Gln29Pro	missense_variant	CH	het	22.8			PM2, PM3	VUS-Warm	Likely Pathogenic	Y	Referred to expedite analysis and avoid the sequential panel- based testing offered at the time.	2	D	Q/P	cAa/cCa	0.284	ENSG00000198001	ENST00000613694.5	2/12			Uncertain	0.408223	0, 0, 0, 0
023CDA001	Congenital dyserythropoietic anaemia	SNV	IRAK4	chr12:g.43768273G>A	ENST00000613694.5:c.161+1G>A	splice_donor_variant	CH	het	34			PVS1, PM2	Likely Pathogenic	Likely Pathogenic	Y	Referred to expedite analysis and avoid the sequential panel- based testing offered at the time.	2	D			0.284	ENSG00000198001	ENST00000613694.5		2/11				0, 0, 0.07, 0.99	0.74	8.182	8.922
066NNH001	Neonatal Haemochromatosis	DEL	BMP6	chr6:g.7427050_7427053delAACA		enhancer	CH	het		1.971e-05		PM2	VUS	Lead Candidate	N	Gene not incorporated into validated panel test at the time of referral	3	D											NA, NA, NA, NA
066NNH001	Neonatal Haemochromatosis	SNV	BMP6	chr6:g.7673126T>C		enhancer	CH	het	14.62	0.004777		PM2	VUS	Lead Candidate	N	Gene not incorporated into validated panel test at the time of referral	3	D											NA, NA, NA, NA
066NNH001	Neonatal Haemochromatosis	INS	HSD3B7	chr16:g.30989353_30989354insG		downstream_gene_variant	CH	het	3.757	0.001551		No criteria applied	VUS	Lead Candidate	N	Differential diagnosis pursued. Appropriate gene panel not selected	3	C			0.167	ENSG00000099377	ENST00000297679.10						NA, NA, NA, NA
066NNH001	Neonatal Haemochromatosis	SNV	HSD3B7	chr16:g.30989573T>C		downstream_gene_variant	CH	het	16.05	0.006028		BS1	Likely Benign	Lead Candidate	N	Differential diagnosis pursued. Appropriate gene panel not selected	3	C			0.167	ENSG00000099377	ENST00000297679.10						NA, NA, NA, NA
010MCP002	Microcephaly	DEL	NPAS4	chr11:g.66422721_66422727delCAGAGTG	ENST00000311034.6:p.Ser161fs	frameshift_variant	AR	hom				PM2	VUS	Lead Candidate	Y	Novel candidate gene for disease, would not have been tested	3	D	QSA/X	CAGAGTGca/ca	0.246	ENSG00000174576	ENST00000311034.7	4/8					NA, NA, NA, NA
065DSA001	Diffuse Skeletal Angiomatosis	DEL	LEMD3	chr12:g.65182627_65182631delGCAGC	ENST00000308330.3:c.1522+11509_1522+11513delGCAGC	intron_variant	Somatic	Somatic	12.14	0		PM2	VUS	Unsolved	N	Clinician suspicion initially for a germline variant	1	D			0.44	ENSG00000174106	ENST00000308330.3		1/12				NA, NA, NA, NA
006Spa001	Spastic Paraparesis	DEL	KCNQ1	chr11:g.2570720_2570724delGCTGC	ENST00000155840.9:p.Arg192fs	frameshift_variant	AD	het	30	1.971e-05		PVS1, PS4	Pathogenic	Unsolved	Y	Incidental finding	2	IF	RLR/RX	cgGCTGCgc/cggc	0.00344	ENSG00000053918	ENST00000155840.12	3/16		ClinVar::RCV000233139,RCV000182268,RCV000144973,VCV000053072,RCV000853261,RCV000602841,RCV000590377,RCV001258104--PhenCode::LQTS_AF000571.1:c.572_576del			NA, NA, NA, NA
020Cha001	Charcot Marie Tooth (type 2)	DEL	FBN1	chr15:g.48472622delT	ENST00000316623.9:p.Asn1422fs	frameshift_variant	AD, DNM	het				PVS1, PM2, PS2_Supp	Pathogenic	Unsolved	Y	Incidental finding	3	IF	N/X	aAt/at	0.00289	ENSG00000166147	ENST00000316623.10	35/66					0, 0, 0, 0
021mTL001	Bilateral Mesial Temporal Lobe Epilepsy	SV_DEL	APP	chr21:g.26076967_26097154del	chr21:g.26076967_26097154del		AD	het				CNV-no criteria applied	VUS	Lead Candidate	N	Not detectable by array-CGH	1	C											NA, NA, NA, NA

## Sheet: Table S7_readme
Column	Description
Variant Type	SNV: single nucleotide variant; DEL: small deletion; INS: small insertion; MNV: multi-nucleotide variant; SV_DEL: large deletion; SV_DUP: large duplication; SV_OTHER: other structural variation types
Genomic Location (GRCh38)	Genomic GRCh38 coordinates in HGVSg notation.
Zygosity	Zygoosity in affected sample(s)
HGVS	A mix of HGVSp HGVSc and HGVSg entries, depending on the variant type. The coordinates are provided relative to the Ensembl canonical transcript where possible or for all overlapping Ensembl transcripts otherwise. For large structural variations, we provide genomic coordinates.
Consequence (most severe)	Most severe predicted consequence. Consequences were predicted by snpEFF/vep or manually assessed if no automatic prediction was possible.
WGS500 Class	Variant classification schema according to Taylor et al., 2015 (see Supplementary Table S4)
Inheritance model	AD: autosomal dominant, AR: autosomal recessive, CH: compund heterozygous, XD: X-linked dominant, XR: X-linked recessive, XL: X-linked; DNM:de-novo variants
Overlapping Variations	Found existing dbSNP ids
Annotations	from VEP

## Sheet: Table S8 Evidence Causal 
Supplementary Table S8: Evidence for Causality for variants of uncertain significance in known and novel genes
	Disease	Variant Category	Gene	Variant type	Inheritance model	Zygosity	CADD	GnomadAF	Variant ACMG criteria	Variant ACMG classification	Clinician accepted diagnosis	Previous Publication for this variant / case	Novel / known gene	Functional Evidence for variant/ or case	Patient treated on basis of WGS Result?
Variants with Evidence of Causality in Known Genes
037Con002	Congenital Myasthenia	SNV	SLC5A7	Missense	AR	hom	29.9	1.972e-05	PM2, PP3, PP4	VUS-Warm	Yes	Yes [122]	Known, but near-novel at time of discovery of variant	Functional support for other variants in gene	Yes; patient treated with the acetycholinesterase inhibitor (AChE) pyridostigmine based on WGS result
038Con001	Congenital Erythrocytosis	SNV	SLC30A10	Missense	AR	hom	28		PM2, PP3, PP4	VUS-Warm	Yes	Yes	Known. Causes primary erythrocytosis as a result of hypermanganesia	Yes Hypermanganesia confirmed in patient biochemically	Yes Patient treated with Manganese chelating agents
056ENC001	Encephalitis	SNV	CFI	Missense	CH	het	26.4	6.574e-05	PM2, PP3	VUS-Tepid	Yes	Yes [121]	Known gene for complement factor deficiency	Yes Complement factor deficiency confirmed biochemically	Yes, prophylactic vaccination and antibiotics
		SNV	CFI	Missense	CH	het	22.1		PM2	VUS-Cool	Yes	Yes [121]
010FIN004	Fine-Lubinsky Syndrome	SNV	SLC39A13	Missense	AR	hom	29.8		PM2	VUS-Cool	Yes. Changed diagnosis to Spondylocheiro Ehlers Danlos syndrome (similar constellation of clinical features)	No	Known gene associated with Spondylocheiro Ehlers Danlos syndrome	Established gene	No
Variants with Evidence of Causality in Novel Genes
007Cra001	Craniosynostosis	SV_DEL	DHRS3	partial loss of function	AR	hom			CNV -no criteria applied	N/A	Yes	No	Novel	Yes Metabolomics	No
007FAM001	Familial craniosynostosis	SV_DEL	FOXD3	~354kb deletion (including EFCAB7) downstream of FOXD3	AD	het			CNV -no criteria applied	N/A	Yes	No	Novel	Yes, additional families and functional data	No
007Cra002	Craniosynostosis	SV_DUP	non_coding region	duplication	AD	het			CNV -no criteria applied	N/A	Yes	No	Novel	Mouse model develops craniosynostosis	No
010Fin001	Fine-Lubinsky Syndrome	SNV	HDLBP	Splice donor	AR	hom	33		PM2, PP1 and PS	VUS	Yes	No	Novel	Segregates in 5 affected members of this family. Functional studies demonstrate loss of RNA binding. Additional families from GeneMatcher	No
Supplementary Table S8: Cases with variants of uncertain significance with evidence of causality. The table is divided into two sections, according to whether variants are in known or novel disease genes. Four variants were in known genes and were clinically actioned for diagnosis and / or treatment of the corresponding patients. These are included in our diagnostic yield. A further four variants…

## Sheet: Table S9 AltSplice validn
Supplementary Table S9: Comparison of SpliceAI and ALTSPLICE scores for a set of manually curated splice site or control variants, after Strauch et al 2022
CHROM	POS	REF	ALT	SpliceAffecting	ALTSPLICE_Score	SpliceAI_masked	SpliceAI_raw
1	2303402	T	G	1	0.952827	0.99	0.99
1	10627363	G	A	1	0.658674	0.91	0.91
1	15440490	C	A	1	0.220033	0.3	0.3
1	15445585	G	A	1	0.709687	0.88	0.88
1	21831803	C	T	1	0.874495	0.98	0.98
1	25284758	A	G	1	0.511453	0.69	0.69
1	25284759	G	C	1	0.7556	0.97	0.97
1	25284759	G	T	1	0.767773	0.97	0.97
1	25284760	G	A	1	0.871375	0.97	0.97
1	25290639	A	G	1	0.898461	0.94	0.94
1	25290640	G	A	1	0.920855	0.94	0.94
1	25290792	G	A	1	0.912755	0.93	0.93
1	25290793	T	A	1	0.939411	0.93	0.93
1	25290794	G	C	1	0.647766	0.74	0.74
1	25290796	G	A	1	0.793767	0.92	0.92
1	25301093	G	C	1	0.602475	0.87	0.87
1	25301093	G	T	1	0.566518	0.76	0.76
1	25301094	G	A	1	0.924475	1	1
1	25301095	T	A	1	0.939549	1	1
1	25301098	G	A	1	0.4418	0.77	0.77
1	25301098	G	T	1	0.413838	0.78	0.78
1	25301518	A	G	1	0.909293	1	1
1	25301520	G	T	1	0.103235	0.03	0.03
1	25301687	G	A	1	0.836415	1	1
1	25303459	G	A	1	0.493268	0.34	0.34
1	25303461	T	A	1	0.949507	0.99	0.99
1	25306731	T	C	1	0.631928	0.75	0.75
1	25316998	A	C	1	0.891244	0.93	0.93
1	25317078	A	C	1	0.167214	0.39	0.39
1	25317080	G	A	1	0.885416	0.97	0.97
1	25321881	T	A	1	0.334989	0.71	0.71
1	25321889	G	C	1	0.557207	0.84	0.84
1	25321961	A	T	1	0.336496	0.44	0.44
1	25321962	G	A	1	0.648319	0.81	0.81
1	26773899	G	T	1	0.909934	1	1
1	29206760	A	C	1	0.793942	1	1
1	42747800	T	G	1	0.939278	0.99	0.99
1	42755070	C	T	1	0.536343	0.62	0.62
1	50970498	G	T	1	0.66442	0.76	0.76
1	63623761	G	A	1	0.234416	0	0.08
1	94011256	A	G	1	0.458343	0.45	0.45
1	149926665	G	A	1	0.570474	0.37	0.37
1	150558649	G	A	1	0.525694	0.61	0.61
1	156115274	G	C	1	0.402959	0.47	0.47
1	156130740	C	T	1	0.370304	0.54	0.54
1	156130773	G	A	1	0.367627	0.45	0.45
1	156134795	A	G	1	0.968101	1	1
1	156134933	G	A	1	0.450321	0.9	0.9
1	156135894	C	G	1	0.292545	0.35	0.35
1	156136110	C	T	1	0.814432	0.98	0.98
1	156136916	G	A	1	0.632758	0.97	0.97
1	156136921	G	T	1	0.0330241	0.01	0.01
1	156137651	C	G	1	0.504158	0.81	0.81
1	156138610	G	A	1	0.411	0.09	0.09
1	156138611	G	A	1	0.392805	0.09	0.09
1	156138613	C	T	1	0.344002	0.09	0.09
1	156138757	G	A	1	0.246148	0.06	0.06
1	160283549	G	A	1	0.0518737	0.07	0.07
1	172573999	G	A	1	0.948503	0.96	0.96
1	197122044	C	G	1	0.878892	0.97	0.97
1	200565069	C	T	1	0.588761	0.63	0.63
1	231265290	T	G	1	0.826717	0.82	0.82
1	235980495	C	T	1	0.793134	0.99	0.99
1	243307837	G	A	1	0.296949	0.38	0.38
2	47429942	G	A	1	0.908088	1	1
2	47478271	G	A	1	0.928448	0.98	0.98
2	63174669	C	A	1	0.959483	0.97	0.97
2	111997478	T	G	1	0.943433	0.96	0.96
2	112019523	G	T	1	0.94382	0.98	0.98
2	112022400	T	A	1	0.197032	0.66	0.66
2	165344914	A	G	1	0.467455	0.57	0.57
2	166278327	A	C	1	0.250624	0.62	0.62
2	169821942	C	T	1	0.903167	0.99	0.99
2	171473981	T	G	1	0.850613	0.85	0.85
2	196778893	T	C	1	0.397895	0.65	0.65
2	201629229	C	T	1	0.927995	0.96	0.96
2	218661526	C	T	1	0.150353	0.35	0.35
2	218814459	G	A	1	0.869022	0.98	0.98
2	219165165	G	A	1	0.0245458	0.02	0.02
2	231206294	G	T	1	0.666677	0.83	0.83
2	231262306	C	T	1	0.0150932	0	0
3	10142189	T	C	1	0.762557	0.89	0.89
3	10146638	T	C	1	0.892416	0.96	0.96
3	25737407	G	A	1	0.781813	0.97	0.97
3	36996624	A	G	1	0.18966	0.01	0.01
3	42176812	A	G	1	0.945971	1	1
3	47638723	A	G	1	0.88138	0.84	0.84
3	49004858	C	A	1	0.449894	0.56	0.56
3	58148853	G	T	1	0.784491	1	1
3	119382400	G	A	1	0.715241	0.99	0.99
3	129507766	A	G	1	0.19236	0.52	0.52
3	196306939	T	A	1	0.690228	0.96	0.96
4	664866	G	A	1	0.356562	0.26	0.26
4	57032426	C	T	1	0.803802	0.93	0.93
4	106194717	C	T	1	0.405532	0.72	0.72
4	122331325	G	A	1	0.945447	1	1
4	127949802	A	G	1	0.864528	0.96	0.96
4	129039039	A	G	1	0.927585	0.95	0.95
5	37139371	C	G	1	0.677256	0.8	0.8
5	74705325	G	C	1	0.89463	0.97	0.97
5	87374922	T	G	1	0.802422	0.94	0.94
5	88729356	A	C	1	0.973487	1	1
5	88731903	T	C	1	0.910443	0.99	0.99
5	112766412	T	C	1	0.748862	0.99	0.99
5	112827921	A	G	1	0.957302	0.99	0.99
5	128318876	T	C	1	0.469434	0.21	0.21
5	134874531	G	A	1	0.896706	0.81	0.81
5	138947482	C	T	1	0.817522	0.97	0.97
5	151676131	C	G	1	0.959521	0.98	0.98
6	24652982	C	A	1	0.853683	1	1
6	26087518	T	C	1	0.773016	0.96	0.96
6	36685748	C	G	1	0.915734	0.95	0.95
6	43045403	C	G	1	0.937516	0.99	0.99
6	43623932	C	T	1	0.628712	0.99	0.99
6	73615314	C	T	1	0.842513	0.9	0.9
6	121292052	C	A	1	0.946168	0.99	0.99
6	129315952	T	C	1	0.877167	0.97	0.97
6	131847776	G	T	1	0.176493	0.34	0.34
6	157167185	G	T	1	0.661281	0.95	0.95
7	5982823	C	T	1	0.812223	0.99	0.99
7	16301467	C	G	1	0.903925	0.92	0.92
7	21706736	G	A	1	0.55123	0.67	0.67
7	41966642	C	T	1	0.910116	0.97	0.97
7	44111058	G	A	1	0.764013	0.99	0.99
7	66994210	A	G	1	0.896384	0.93	0.93
7	87462423	T	C	1	0.367591	0.83	0.83
7	97855352	C	T	1	0.934125	0.98	0.98
7	100628224	C	T	1	0.434141	0.52	0.52
7	107324533	A	T	1	0.900569	0.97	0.97
7	107961544	C	A	1	0.687147	0.61	0.61
7	116771990	G	A	1	0.9402	0.94	0.94
7	116771990	G	C	1	0.947153	0.94	0.94
7	116771990	G	T	1	0.953541	0.94	0.94
7	116771991	T	C	1	0.930862	0.94	0.94
7	116771991	T	G	1	0.947608	0.94	0.94
7	117509031	C	T	1	0.345917	0.21	0.21
7	117531114	G	A	1	0.608882	0.84	0.84
7	117531115	G	T	1	0.758307	0.84	0.84
7	117531117	A	G	1	0.525623	0.72	0.72
7	117531118	A	G	1	0.42872	0.59	0.59
7	117534275	G	C	1	0.964291	0.99	0.99
7	117534366	G	T	1	0.95054	1	1
7	117535247	G	T	1	0.963119	0.88	0.88
7	117535412	G	A	1	0.881822	0.95	0.95
7	117540088	T	A	1	0.824088	0.98	0.98
7	117540347	G	A	1	0.876562	0.89	0.89
7	117542108	G	A	1	0.66998	0.94	0.94
7	117542110	T	G	1	0.872549	0.99	0.99
7	117559462	A	G	1	0.92584	1	1
7	117559655	G	A	1	0.0868458	0.04	0.04
7	117587731	G	A	1	0.933927	0.92	0.92
7	117587736	T	G	1	0.811658	0.93	0.93
7	117587738	G	A	1	0.915089	0.97	0.97
7	117587834	G	C	1	0.92908	0.98	0.98
7	117590440	G	A	1	0.870611	0.86	0.86
7	117590442	A	G	1	0.665378	0.63	0.63
7	117592658	G	A	1	0.821754	0.98	0.98
7	117594930	G	T	1	0.641951	0.56	0.56
7	117602868	G	A	1	0.855864	0.93	0.93
7	117603531	G	A	1	0.890548	0.87	0.87
7	117606753	G	A	1	0.260613	0.75	0.75
7	117606754	G	A	1	0.939723	0.99	0.99
7	117610518	G	A	1	0.949095	0.99	0.99
7	117610518	G	T	1	0.959376	0.99	0.99
7	117610672	A	G	1	0.211387	0.63	0.63
7	117614714	G	A	1	0.963724	0.98	0.98
7	117642437	G	A	1	0.924808	0.98	0.98
7	117642594	G	A	1	0.909766	0.98	0.98
7	117648320	A	G	1	0.0442659	0.02	0.02
7	117665565	G	T	1	0.937059	0.99	0.99
7	139134654	G	C	1	0.916628	0.99	0.99
7	141615468	C	G	1	0.755894	0.84	0.84
8	38424509	C	T	1	0.573593	0.77	0.77
8	42459895	C	T	1	0.643104	0.98	0.98
8	51472306	T	A	1	0.962243	0.92	0.92
8	85465470	G	A	1	0.763021	1	1
9	5772741	G	C	1	0.328607	0.13	0.13
9	21970900	A	G	1	0.831594	0.77	0.77
9	21970901	C	T	1	0.836653	0.77	0.77
9	21970901	C	A	1	0.840205	0.77	0.77
9	21971209	C	T	1	0.837911	1	1
9	21971209	C	A	1	0.812379	1	1
9	21971210	T	G	1	0.733146	1	1
9	95461999	C	T	1	0.948652	0.98	0.98
9	99132727	G	C	1	0.118943	0.01	0.01
9	120419975	T	C	1	0.879693	0.96	0.96
9	131506454	G	T	1	0.941921	1	1
9	132910567	G	A	1	0.307256	0.38	0.38
9	132923347	C	A	1	0.966734	1	1
9	132925746	A	C	1	0.954914	0.99	0.99
10	27208446	C	T	1	0.914059	1	1
10	33254026	A	G	1	0.666311	0.93	0.93
10	33330706	A	C	1	0.960069	0.99	0.99
10	72133056	C	T	1	0.945084	0.99	0.99
10	87931089	G	C	1	0.658436	0.55	0.55
10	87957850	C	A	1	0.63396	0.64	0.64
10	87957850	C	G	1	0.858915	0.85	0.85
10	87957851	A	C	1	0.887005	0.98	0.98
10	87961119	G	T	1	0.854894	1	1
10	87965285	A	T	1	0.942324	0.99	0.99
10	93625654	G	A	1	0.524992	0.86	0.86
10	100827634	A	G	1	0.0108545	0	0
10	110901618	A	G	1	0.241408	0.31	0.31
10	133373241	C	T	1	0.658156	0.89	0.89
11	45910314	T	A	1	0.835251	0.85	0.85
11	45915463	C	T	1	0.745525	0.85	0.85
11	47332270	G	C	1	0.798973	0.95	0.95
11	47333189	C	T	1	0.382979	0.18	0.18
11	47333189	C	G	1	0.357513	0.3	0.3
11	47333189	C	A	1	0.372956	0.21	0.21
11	47333552	C	T	1	0.706033	0.85	0.85
11	47333923	T	C	1	0.510107	0.62	0.62
11	47335037	C	A	1	0.912835	0.96	0.96
11	47335212	G	C	1	0.747695	0.61	0.61
11	47337391	C	T	1	0.305506	0.18	0.18
11	47338682	G	C	1	0.597381	0.34	0.34
11	47341133	C	T	1	0.4616	0.77	0.77
11	47341986	C	T	1	0.653475	0.89	0.89
11	47341991	C	T	1	0.40219	0.49	0.49
11	47342110	G	A	1	0.0607125	0.16	0.16
11	47342163	G	T	1	0.0845736	0.01	0.03
11	47342574	T	A	1	0.445531	0.16	0.16
11	47342578	C	G	1	0.220639	0.02	0.02
11	47342825	C	G	1	0.65573	0.93	0.93
11	47342827	C	G	1	0.182116	0.25	0.25
11	47343154	G	T	1	0.0575048	0.08	0.08
11	47343158	C	T	1	0.875784	0.98	0.98
11	47343159	G	T	1	0.282963	0.43	0.43
11	47343283	T	C	1	0.288247	0.9	0.9
11	47343502	T	C	1	0.741671	0.99	0.99
11	47346379	C	T	1	0.357715	0.28	0.28
11	47346380	G	T	1	0.209396	0.45	0.45
11	47346623	T	C	1	0.295792	0.36	0.4
11	47347037	A	G	1	0.103072	0.12	0.12
11	47347852	C	T	1	0.84207	0.86	0.86
11	47348424	C	T	1	0.313083	0.17	0.17
11	47348426	T	G	1	0.0546547	0.01	0.01
11	47348541	C	G	1	0.0636003	0	0
11	47348541	C	A	1	0.0817571	0.01	0.01
11	47349769	C	T	1	0.359636	0.06	0.06
11	47349792	G	C	1	0.87489	0.98	0.98
11	47350008	A	C	1	0.692913	0.85	0.85
11	47350009	C	G	1	0.745155	0.86	0.86
11	47350048	G	A	1	0.0374184	0.02	0.06
11	47350077	C	T	1	0.605439	0.94	0.94
11	47350117	G	A	1	0.138775	0	0.17
11	47351515	C	T	1	0.445903	0.39	0.39
11	47822082	C	T	1	0.598346	0.54	0.54
11	57739039	G	A	1	0.658939	0.78	0.83
11	59787035	A	G	1	0.890875	0.94	0.94
11	59793515	G	T	1	0.765678	1	1
11	61368594	C	G	1	0.904952	0.91	0.91
11	64805773	G	C	1	0.79807	0.95	0.95
11	65589935	G	A	1	0.701526	0.8	0.8
11	66511090	G	A	1	0.864041	1	1
11	66523634	C	T	1	0.877654	0.89	0.89
11	66524211	C	T	1	0.00549036	0	0
11	67611569	G	A	1	0.137376	0.04	0.21
11	86344724	A	G	1	0.734742	0.6	0.6
11	108271249	A	T	1	0.935378	0.99	0.99
11	112037460	G	C	1	0.778165	0.47	0.47
11	112089016	G	A	1	0.554825	0.62	0.62
12	12718315	G	A	1	0.828209	0.99	0.99
12	32878545	T	A	1	0.912817	0.99	0.99
12	102843790	C	T	1	0.936994	0.98	0.98
12	110626360	A	G	1	0.949212	0.99	0.99
12	119822819	C	T	1	0.925798	0.99	0.99
12	119832768	T	A	1	0.668513	0.95	0.95
12	123699702	A	G	1	0.967123	1	1
13	24885671	C	G	1	0.754577	0.81	0.81
13	25530561	G	T	1	0.937994	0.99	0.99
13	32315668	G	A	1	0.74139	0.99	0.99
13	32316421	G	A	1	0.857569	0.97	0.97
13	32316527	G	A	1	0.785793	0.58	0.58
13	32316528	G	A	1	0.90428	0.98	0.98
13	32316528	G	T	1	0.919929	0.98	0.98
13	32316529	T	C	1	0.907696	0.94	0.94
13	32316530	A	G	1	0.69218	0.56	0.56
13	32319070	T	A	1	0.0742921	0.05	0.05
13	32319330	G	A	1	0.521057	0.89	0.89
13	32319330	G	C	1	0.572699	0.92	0.92
13	32319331	T	C	1	0.150129	0.2	0.2
13	32325184	G	T	1	0.882318	0.97	0.97
13	32326099	A	T	1	0.938467	0.98	0.98
13	32326142	A	G	1	0.833067	0.97	0.97
13	32326148	C	T	1	0.331495	0.37	0.37
13	32326150	G	A	1	0.723513	0.75	0.75
13	32326151	G	A	1	0.916263	0.98	0.98
13	32326153	A	G	1	0.642528	0.68	0.68
13	32326153	A	T	1	0.634344	0.82	0.82
13	32326239	C	A	1	0.205482	0.26	0.31
13	32326240	A	G	1	0.926812	0.98	0.98
13	32326282	G	A	1	0.78508	0.84	0.84
13	32326283	G	A	1	0.947047	0.98	0.98
13	32326283	G	T	1	0.951815	0.98	0.98
13	32326284	T	C	1	0.929556	0.97	0.97
13	32326497	A	G	1	0.738914	0.78	0.78
13	32326498	G	A	1	0.674655	0.78	0.78
13	32326499	G	T	1	0.367735	0.4	0.4
13	32326502	C	T	1	0.259639	0.27	0.27
13	32326599	C	G	1	0.190118	0.13	0.13
13	32326613	G	A	1	0.695114	0.81	0.81
13	32326615	T	G	1	0.717507	0.82	0.82
13	32326616	A	G	1	0.657739	0.71	0.71
13	32326617	A	G	1	0.629063	0.71	0.71
13	32329440	C	G	1	0.95439	0.95	0.95
13	32329442	G	A	1	0.952858	0.99	0.99
13	32329493	G	A	1	0.946168	1	1
13	32329496	A	G	1	0.879914	0.94	0.94
13	32330917	A	C	1	0.957069	1	1
13	32330917	A	G	1	0.950313	1	1
13	32331031	G	C	1	0.960479	1	1
13	32346896	G	A	1	0.421778	0.28	0.28
13	32346896	G	C	1	0.456742	0.18	0.18
13	32346897	G	C	1	0.965297	1	1
13	32354859	A	G	1	0.929789	0.97	0.97
13	32354859	A	T	1	0.941533	0.97	0.97
13	32356426	A	G	1	0.901569	0.95	0.95
13	32356426	A	T	1	0.921425	0.95	0.95
13	32356610	G	A	1	0.938065	0.98	0.98
13	32356610	G	T	1	0.951824	0.98	0.98
13	32356611	T	G	1	0.942084	0.98	0.98
13	32357741	G	A	1	0.945088	0.99	0.99
13	32357929	G	C	1	0.690431	0.92	0.92
13	32362514	T	G	1	0.549978	0.96	0.96
13	32362521	A	G	1	0.557396	0.97	0.97
13	32362692	A	G	1	0.452185	0.51	0.51
13	32362693	G	A	1	0.469876	0.82	0.82
13	32362693	G	C	1	0.475658	0.88	0.88
13	32363172	C	G	1	0.875541	0.98	0.98
13	32363173	T	G	1	0.103179	0.03	0.03
13	32363178	G	C	1	0.933857	0.95	0.95
13	32363225	A	G	1	0.924035	0.99	0.99
13	32363370	A	G	1	0.343437	0.23	0.23
13	32363533	G	A	1	0.665336	0.78	0.78
13	32370401	G	A	1	0.929275	0.99	0.99
13	32370448	G	T	1	0.24671	0.36	0.36
13	32370556	A	G	1	0.34743	0.36	0.36
13	32370556	A	T	1	0.444379	0.54	0.54
13	32370557	G	A	1	0.801307	0.91	0.91
13	32370557	G	C	1	0.885773	0.95	0.95
13	32370558	G	A	1	0.947523	0.96	0.96
13	32370559	T	C	1	0.9411	0.96	0.96
13	32370560	A	G	1	0.657953	0.56	0.56
13	32370954	A	G	1	0.80347	0.92	0.92
13	32370955	G	A	1	0.85427	0.92	0.92
13	32371101	G	A	1	0.908431	0.99	0.99
13	32376668	A	G	1	0.936424	0.99	0.99
13	32376791	G	A	1	0.810269	0.98	0.98
13	32376791	G	C	1	0.813881	0.99	0.99
13	32376792	G	A	1	0.952656	0.99	0.99
13	32376792	G	C	1	0.956351	0.99	0.99
13	32376794	G	C	1	0.594389	0.75	0.75
13	32376795	A	G	1	0.593205	0.74	0.74
13	32376796	G	A	1	0.713591	0.85	0.85
13	32376796	G	T	1	0.605838	0.85	0.85
13	32379316	G	A	1	0.877651	0.99	0.99
13	32379455	G	T	1	0.707989	0.9	0.9
13	32379516	G	T	1	0.849297	0.99	0.99
13	32379517	T	G	1	0.84231	0.99	0.99
13	32379745	A	G	1	0.343467	0.85	0.85
13	32379747	C	G	1	0.362933	0.9	0.9
13	32379913	G	A	1	0.695877	0.89	0.89
13	32379914	G	A	1	0.785734	0.93	0.93
13	32379914	G	T	1	0.79604	0.93	0.93
13	32379915	T	A	1	0.757147	0.93	0.93
13	32379915	T	C	1	0.7494	0.93	0.93
13	32380005	A	G	1	0.949492	0.99	0.99
13	32380145	G	T	1	0.544485	0.62	0.62
13	32380146	G	A	1	0.702073	1	1
13	32394688	G	C	1	0.922066	1	1
13	32394936	A	T	1	0.27096	0.17	0.17
13	32396896	A	C	1	0.952675	0.98	0.98
13	32398160	A	G	1	0.908256	0.99	0.99
13	36331419	T	C	1	0.41103	0.9	0.9
13	39682163	T	G	1	0.70483	0.87	0.87
13	39699477	A	G	1	0.485295	0.51	0.51
13	48379655	G	C	1	0.923448	0.94	0.94
13	48463840	G	T	1	0.395557	0.72	0.72
13	110212573	C	T	1	0.842538	0.97	0.97
14	24260059	C	G	1	0.841517	0.94	0.94
14	74245159	C	G	1	0.46888	0.48	0.48
14	77298688	C	T	1	0.898421	0.98	0.98
14	77299955	T	C	1	0.865445	0.9	0.9
14	95117622	C	T	1	0.339437	0.51	0.51
15	31063089	C	T	1	0.392782	0.5	0.5
15	40774356	C	T	1	0.179447	0.47	0.47
15	48421651	C	T	1	0.231683	0.7	0.7
15	48421950	A	C	1	0.824967	1	1
15	48427567	C	G	1	0.572253	0.75	0.75
15	48427568	T	C	1	0.209123	0.08	0.08
15	48430805	G	C	1	0.9706	0.99	0.99
15	48437004	G	A	1	0.869642	0.84	0.84
15	48437765	T	A	1	0.759321	0.85	0.85
15	48446701	C	T	1	0.395643	0.47	0.47
15	48460246	C	T	1	0.812718	0.91	0.91
15	48467933	C	T	1	0.819192	0.89	0.89
15	48468412	C	A	1	0.348417	0.13	0.13
15	48481655	C	G	1	0.522804	0.97	0.97
15	48488254	A	T	1	0.936563	1	1
15	48497266	C	T	1	0.692935	0.88	0.88
15	48516364	T	C	1	0.916305	0.99	0.99
15	48520818	C	T	1	0.949485	0.89	0.89
15	48537611	C	T	1	0.610639	0.77	0.77
15	48600138	C	T	1	0.938136	0.87	0.87
15	48613001	T	C	1	0.779547	0.95	0.95
15	55340602	A	G	1	0.929412	0.98	0.98
15	63634733	C	T	1	0.454057	0.75	0.75
15	72351132	C	A	1	0.939964	0.98	0.98
15	72712242	A	G	1	0.969214	0.99	0.99
15	93002171	T	G	1	0	0	0
16	1457355	C	T	1	0.152447	0.19	0.19
16	1571535	C	T	1	0.945985	0.99	0.99
16	2079554	C	G	1	0.688675	0.55	0.55
16	2084714	A	C	1	0.606305	0.41	0.41
16	23613999	C	G	1	0.761168	0.89	0.89
16	23629638	A	G	1	0.80763	0.98	0.98
16	70255728	C	T	1	0.512767	0.73	0.73
16	75541466	A	G	1	0.152001	0.18	0.19
16	78424869	G	A	1	0.942649	0.99	0.99
16	88710287	G	A	1	0.622019	0.53	0.53
16	88713447	G	A	1	0.58713	0.81	0.81
16	89805278	A	G	1	0.844075	0.75	0.75
17	2674291	A	G	1	0.326554	0.24	0.24
17	2676612	T	A	1	0.536244	0.36	0.36
17	6707026	A	C	1	0.673333	0.85	0.85
17	7669692	T	G	1	0.838651	0.76	0.76
17	7670716	C	T	1	0.859039	1	1
17	7670716	C	G	1	0.91303	0.99	0.99
17	7670717	T	C	1	0.902198	1	1
17	7673533	A	C	1	0.891341	1	1
17	7673534	C	T	1	0.829906	0.99	0.99
17	7673534	C	A	1	0.896693	1	1
17	7673609	C	T	1	0.959361	1	1
17	7673700	C	G	1	0.725288	1	1
17	7673700	C	A	1	0.740841	1	1
17	7673838	C	A	1	0.848511	1	1
17	7673839	T	G	1	0.85115	1	1
17	7673839	T	A	1	0.839918	1	1
17	7674180	C	A	1	0.865203	1	1
17	7674181	C	G	1	0.597544	0.64	0.64
17	7674291	C	T	1	0.937703	1	1
17	7674292	T	G	1	0.965156	1	1
17	7674292	T	C	1	0.962636	1	1
17	7674292	T	A	1	0.966151	1	1
17	7674857	A	C	1	0.765833	0.99	0.99
17	7674858	C	T	1	0.788972	0.99	0.99
17	7674858	C	A	1	0.838637	0.99	0.99
17	7674859	C	T	1	0.612469	0.9	0.9
17	7674859	C	A	1	0.628323	0.97	0.97
17	7674972	C	T	1	0.927016	0.98	0.98
17	7675051	A	T	1	0.799001	1	1
17	7675052	C	T	1	0.799174	1	1
17	7675053	C	G	1	0.38567	0.4	0.4
17	7675237	C	T	1	0.899953	1	1
17	7675238	T	C	1	0.81125	1	1
17	7675238	T	A	1	0.908119	1	1
17	7675989	C	T	1	0.840004	0.9	0.9
17	7675992	A	G	1	0.883809	0.97	0.97
17	7675992	A	C	1	0.898979	0.98	0.98
17	7675993	C	T	1	0.929015	0.98	0.98
17	7675993	C	A	1	0.935068	0.98	0.98
17	7675994	C	T	1	0.763709	0.58	0.58
17	7675994	C	A	1	0.811854	0.72	0.72
17	8015846	G	A	1	0.788795	0.94	0.94
17	8175756	C	T	1	0.572038	0.22	0.22
17	29250298	C	T	1	0.584972	0.72	0.72
17	31170002	G	A	1	0.211184	0.74	0.74
17	31200598	A	G	1	0.518274	0.54	0.54
17	31219119	G	A	1	0.944653	1	1
17	31258504	T	C	1	0.888598	0.99	0.99
17	31357294	A	G	1	0.45473	0.43	0.43
17	43045804	T	C	1	0.904419	1	1
17	43047638	C	G	1	0.250136	0.27	0.27
17	43047641	A	G	1	0.899114	0.95	0.95
17	43047642	C	T	1	0.909529	0.95	0.95
17	43047643	C	T	1	0.624447	0.74	0.74
17	43047657	T	C	1	0.103898	0.34	0.39
17	43047676	G	C	1	0.123611	0.18	0.18
17	43047702	C	G	1	0.0322063	0	0.02
17	43047705	T	C	1	0.847334	0.91	0.91
17	43049116	C	T	1	0.850328	0.9	0.9
17	43049116	C	G	1	0.868507	0.97	0.97
17	43049117	T	C	1	0.312743	0.12	0.12
17	43049118	T	A	1	0.702605	0.72	0.72
17	43049119	A	C	1	0.952882	0.99	0.99
17	43049120	C	T	1	0.91773	0.99	0.99
17	43049195	C	A	1	0.959655	1	1
17	43049197	A	C	1	0.585754	0.91	0.91
17	43049200	A	C	1	0.726605	0.79	0.79
17	43051061	A	T	1	0.939054	0.99	0.99
17	43051062	C	T	1	0.910992	0.99	0.99
17	43051063	C	T	1	0.200105	0.12	0.12
17	43051063	C	A	1	0.533677	0.58	0.58
17	43051118	C	T	1	0.934749	0.96	0.96
17	43051118	C	G	1	0.938905	0.96	0.96
17	43051118	C	A	1	0.9497	0.96	0.96
17	43057051	C	T	1	0.722039	0.99	0.99
17	43057136	C	A	1	0.958404	1	1
17	43057147	C	T	1	0.862765	0.96	0.96
17	43063331	A	C	1	0.954901	0.98	0.98
17	43063374	C	T	1	0.946486	0.99	0.99
17	43063399	T	C	1	0.385571	0.23	0.23
17	43063868	A	G	1	0.703135	0.7	0.7
17	43063869	C	T	1	0.870783	0.89	0.89
17	43063869	C	G	1	0.868681	0.9	0.9
17	43063873	C	G	1	0.906292	0.9	0.9
17	43063946	C	T	1	0.0862935	0.21	0.21
17	43063953	T	C	1	0.93649	0.83	0.83
17	43063959	A	C	1	0.876135	0.79	0.79
17	43067605	T	C	1	0.664539	0.71	0.71
17	43067607	C	T	1	0.871624	0.74	0.74
17	43067607	C	A	1	0.893421	0.74	0.74
17	43067608	C	T	1	0.724288	0.73	0.73
17	43067608	C	G	1	0.777063	0.74	0.74
17	43067608	C	A	1	0.826089	0.74	0.74
17	43067610	G	A	1	0.516308	0.66	0.66
17	43067694	A	T	1	0.241543	0.37	0.37
17	43067695	T	A	1	0.433633	0.46	0.46
17	43067696	C	T	1	0.914348	0.73	0.73
17	43067697	T	C	1	0.90914	0.73	0.73
17	43067698	G	C	1	0.898495	0.73	0.73
17	43067700	A	T	1	0.784428	0.7	0.7
17	43067701	A	G	1	0.681833	0.66	0.66
17	43070922	A	G	1	0.50281	0.52	0.52
17	43070922	A	C	1	0.703447	0.83	0.83
17	43070923	C	T	1	0.791628	0.99	0.99
17	43070923	C	A	1	0.792465	0.99	0.99
17	43070924	T	C	1	0.631265	0.81	0.81
17	43070925	C	G	1	0.685602	0.93	0.93
17	43070927	C	A	1	0.868534	0.99	0.99
17	43071046	G	C	1	0.698283	0.92	0.92
17	43074330	C	T	1	0.881384	0.96	0.96
17	43074331	C	T	1	0.653572	0.77	0.77
17	43074331	C	G	1	0.576818	0.9	0.9
17	43074522	C	G	1	0.901602	0.96	0.96
17	43076487	C	T	1	0.838933	0.97	0.97
17	43076487	C	A	1	0.841791	0.97	0.97
17	43076488	C	T	1	0.556689	0.51	0.51
17	43076488	C	G	1	0.580489	0.47	0.47
17	43076488	C	A	1	0.692629	0.6	0.6
17	43082398	A	G	1	0.192395	0.04	0.04
17	43082403	C	T	1	0.888677	0.99	0.99
17	43082403	C	A	1	0.901519	1	1
17	43090941	T	A	1	0.865433	0.83	0.83
17	43090944	C	T	1	0.894248	0.93	0.93
17	43090944	C	G	1	0.914775	0.95	0.95
17	43091034	T	C	1	0.960121	0.98	0.98
17	43091432	T	C	1	0.660208	0.64	0.64
17	43091434	C	T	1	0.742881	0.69	0.69
17	43094862	T	G	1	0.91917	0.98	0.98
17	43095848	T	C	1	0.341198	0.22	0.22
17	43095924	T	G	1	0.767204	0.83	0.83
17	43097240	T	C	1	0.350089	0.31	0.5
17	43097246	G	A	1	0.26157	0.13	0.17
17	43099772	T	A	1	0.913396	0.93	0.93
17	43099773	A	T	1	0.957031	0.99	0.99
17	43099773	A	G	1	0.947695	0.99	0.99
17	43099883	A	C	1	0.706637	0.86	0.86
17	43104120	A	T	1	0.769516	1	1
17	43104120	A	C	1	0.783183	1	1
17	43104121	C	T	1	0.798312	0.99	0.99
17	43104262	C	T	1	0.871966	1	1
17	43104264	G	C	1	0.957463	1	1
17	43104862	A	G	1	0.387829	0.59	0.59
17	43104867	C	G	1	0.538367	0.67	0.67
17	43104957	C	T	1	0.580584	0.77	0.77
17	43104958	T	G	1	0.518096	0.77	0.77
17	43104958	T	C	1	0.51987	0.77	0.77
17	43104961	A	C	1	0.520863	0.76	0.76
17	43104967	A	C	1	0.525789	0.71	0.71
17	43104968	T	C	1	0.388826	0.68	0.68
17	43104970	G	C	1	0.38263	0.69	0.69
17	43104971	T	C	1	0.432258	0.68	0.68
17	43106453	T	C	1	0.444365	0.63	0.63
17	43106454	A	G	1	0.671866	0.65	0.65
17	43106455	C	T	1	0.717086	0.65	0.65
17	43106455	C	G	1	0.722616	0.65	0.65
17	43106455	C	A	1	0.735693	0.65	0.65
17	43106456	C	T	1	0.525167	0.65	0.65
17	43106456	C	A	1	0.570587	0.65	0.65
17	43106457	T	C	1	0.367145	0.64	0.64
17	43106534	C	G	1	0.88499	0.86	0.86
17	43106539	A	C	1	0.278383	0.29	0.29
17	43115723	T	G	1	0.885519	0.87	0.87
17	43115723	T	A	1	0.864397	0.83	0.83
17	43115725	C	T	1	0.916334	0.98	0.98
17	43115728	G	A	1	0.743084	0.92	0.92
17	43115780	C	G	1	0.860536	0.96	0.96
17	43115785	A	T	1	0.875463	0.96	0.96
17	43115788	G	C	1	0.944053	1	1
17	43124016	C	T	1	0.941735	0.9	0.9
17	44257981	C	G	1	0.571145	0.53	0.53
17	46033197	A	C	1	0.394423	0.61	0.61
17	46066537	C	T	1	0.702375	0.5	0.5
17	50168577	G	A	1	0.719377	0.69	0.69
17	50191786	A	T	1	0.824132	1	1
17	50277743	A	G	1	0.100463	0.05	0.05
17	75751112	G	C	1	0.806702	0.98	0.98
17	76733217	T	C	1	0.788946	0.77	0.77
17	82906053	G	C	1	0.731985	0.81	0.81
18	49097401	C	T	1	0.958593	0.99	0.99
18	70028821	T	C	1	0.130815	0.24	0.24
18	70135176	T	C	1	0.497745	0.64	0.64
19	11021724	G	A	1	0.875615	1	1
19	11034913	G	C	1	0.858662	1	1
19	11214650	C	G	1	0.940823	0.99	0.99
19	12669127	C	A	1	0.890731	0.99	0.99
19	12896908	A	G	1	0.872372	0.99	0.99
19	13913639	G	T	1	0.930222	0.98	0.98
19	43744768	T	C	1	0.5094	0.91	0.91
19	44949158	G	A	1	0.862112	0.89	0.89
19	49862369	A	G	1	0.74592	0.93	0.93
19	49864320	T	C	1	0.69321	0.32	0.32
19	50414813	A	T	1	0.914794	0.99	0.99
20	25307961	C	T	1	0.804791	0.76	0.76
21	44330349	T	A	1	0.0826227	0.11	0.11
21	44331842	C	T	1	0.769572	0.92	0.92
21	46119852	T	C	1	0.885317	0.91	0.91
21	46126238	G	A	1	0.930542	0.97	0.97
22	18078604	C	T	1	0.913381	0.99	0.99
22	23793689	G	C	1	0.637536	1	1
22	23801082	G	A	1	0.326602	0.56	0.56
22	29363107	C	T	1	0.953583	1	1
22	29639213	G	A	1	0.787484	0.98	0.98
X	38287248	G	C	1	0.334045	0.42	0.42
X	38322853	C	A	1	0.788702	0.68	0.68
X	130140644	A	C	1	0.0524797	0.15	0.15
X	139785224	A	G	1	0.933762	0.99	0.99
X	154769320	G	A	1	0.468741	0.87	0.87
1	12001422	C	T	0	0.014567	0	0
1	25284574	T	C	0	0.0462274	0.11	0.11
1	25290790	A	G	0	0.053672	0.14	0.14
1	25301521	C	T	0	0.0274299	0	0
1	25301685	A	T	0	0.0350419	0	0
1	25303458	C	T	0	0.0134881	0	0
1	25306592	A	C	0	0.217003	0.29	0.29
1	25306597	G	T	0	0.272637	0	0.18
1	25306729	T	C	0	0.092795	0.13	0.13
1	146019740	G	C	0	0	0.08	0.08
1	156114969	C	T	0	0.00849236	0	0
1	156114976	C	T	0	0.00675965	0	0
1	156114981	G	A	0	0.0116735	0	0
1	156115060	C	G	0	0.0515232	0	0
1	156115065	G	A	0	0.0473651	0	0
1	156115068	C	T	0	0.0402994	0	0
1	156115076	A	T	0	0.0943755	0.02	0.02
1	156115179	T	C	0	0.00428516	0	0
1	156115194	T	A	0	0.00946276	0	0
1	156115205	C	G	0	0.0145153	0	0.03
1	156115264	C	G	0	0.493873	0.15	0.15
1	156130598	T	C	0	0.00658819	0	0
1	156130756	C	T	0	0.0199782	0.01	0.01
1	156134393	T	C	0	0.0118439	0.01	0.01
1	156134445	G	A	0	0.00823597	0	0
1	156134457	C	T	0	0.0252155	0.01	0.01
1	156134462	G	A	0	0.0119261	0	0
1	156134464	A	G	0	0.0304805	0.01	0.01
1	156134497	A	G	0	0.0150996	0	0
1	156134518	T	G	0	0.177942	0	0.05
1	156134533	G	C	0	0.399797	0.6	0.6
1	156134753	C	T	0	0.00474238	0	0
1	156134794	A	C	0	0.0223755	0	0
1	156134796	C	T	0	0.013804	0	0
1	156134808	C	G	0	0.0298639	0	0
1	156134809	T	C	0	0.00541587	0	0
1	156134810	G	C	0	0.00472473	0	0
1	156134846	G	A	0	0.019636	0	0.03
1	156134868	C	G	0	0.277248	0.55	0.55
1	156134979	C	A	0	0.066747	0	0.05
1	156135004	G	T	0	0.0166251	0	0
1	156135007	T	C	0	0.00610991	0	0
1	156135011	C	T	0	0.0145839	0	0
1	156135179	C	T	0	0.00844875	0	0
1	156135260	C	T	0	0.00486991	0	0
1	156135271	A	G	0	0.00534592	0	0
1	156135273	C	G	0	0.00712602	0	0
1	156135324	C	T	0	0.00648003	0	0
1	156135331	C	T	0	0.0123993	0	0
1	156135895	C	T	0	0.0616243	0	0.29
1	156135913	G	A	0	0.00974817	0	0
1	156135918	G	A	0	0.0137723	0	0
1	156135949	C	A	0	0.0140621	0	0
1	156136124	G	A	0	0.177568	0	0.02
1	156136127	C	G	0	0.18769	0.08	0.08
1	156136240	C	T	0	0.0302268	0.07	0.07
1	156136243	A	T	0	0.0313737	0	0.01
1	156136279	A	C	0	0.263926	0.38	0.38
1	156136283	A	G	0	0.0283502	0	0.03
1	156136293	G	A	0	0.0398438	0.15	0.15
1	156136293	G	T	0	0.0443634	0.15	0.15
1	156136368	G	A	0	0.0219922	0.1	0.1
1	156136371	C	T	0	0.0956942	0.2	0.2
1	156136373	C	A	0	0.00830017	0	0
1	156136386	G	A	0	0.00983779	0.01	0.01
1	156136414	G	A	0	0.0157234	0	0
1	156136432	A	G	0	0.0480676	0.01	0.01
1	156136917	G	A	0	0.0119569	0	0.01
1	156136982	A	G	0	0.0125834	0	0
1	156136985	G	A	0	0.019305	0	0.01
1	156136985	G	T	0	0.0143708	0	0
1	156137022	G	A	0	0.478442	0.65	0.65
1	156137027	C	T	0	0.0520951	0.05	0.05
1	156137028	G	A	0	0.240339	0.52	0.52
1	156137034	T	G	0	0.268324	0.59	0.59
1	156137104	C	T	0	0.0129791	0	0
1	156137225	C	G	0	0.0263765	0.01	0.01
1	156137226	T	C	0	0.00715208	0.03	0.03
1	156137709	A	G	0	0.148356	0.17	0.17
1	156138500	A	C	0	0.0576685	0.01	0.02
1	156138601	A	T	0	0.132676	0.06	0.08
1	156138626	T	C	0	0.0782377	0.02	0.06
1	156138646	T	C	0	0.074965	0	0.06
1	156138659	C	T	0	0.0858287	0.03	0.04
1	156138662	A	C	0	0.0837082	0.09	0.09
1	156138662	A	T	0	0.0744145	0.04	0.04
1	156138663	G	C	0	0.0711014	0.02	0.02
1	156138678	G	T	0	0.157316	0.06	0.06
1	156138692	G	A	0	0.036558	0.03	0.03
1	156138733	G	A	0	0.243742	0.37	0.37
1	156138794	C	T	0	0.193102	0.01	0.01
1	156138795	G	A	0	0.0260974	0	0.02
1	215650556	G	C	0	0.0617599	0.04	0.04
2	3580263	A	G	0	0.407244	0.08	0.08
2	47798789	C	G	0	0.220489	0.01	0.01
2	47803663	G	A	0	0.0565615	0	0
2	47804894	C	T	0	0.0180671	0	0
2	74376741	C	T	0	0.0753415	0.06	0.06
2	188997223	G	A	0	0.0747221	0	0
2	189006384	G	A	0	0.00610503	0	0
2	189572846	G	A	0	0.0634158	0	0
3	36993627	G	A	0	0.0452873	0.03	0.03
3	37020360	A	C	0	0.00796791	0	0
3	37048615	T	G	0	0.487766	0.54	0.54
5	112767263	C	T	0	0.0533265	0.03	0.03
6	33173502	C	T	0	0.0911682	0.06	0.06
6	64077298	T	C	0	0.00699474	0	0
7	117530893	T	C	0	0.039277	0.02	0.02
7	117540096	A	G	0	0.0224627	0.27	0.27
7	117602820	T	C	0	0.0360051	0.01	0.02
7	117606670	A	G	0	0.0252871	0	0.02
8	99766874	C	T	0	0.00503906	0	0
9	95459794	G	A	0	0.0185433	0	0
9	134731526	G	A	0	0.0125215	0.01	0.01
10	87933132	A	G	0	0.0298573	0.02	0.02
10	87952178	C	G	0	0.0144372	0	0
10	87952218	T	C	0	0.0287556	0	0
10	87960922	C	T	0	0.0662766	0.1	0.1
10	93629247	T	C	0	0.0979465	0.06	0.06
11	47331891	A	C	0	0.395758	0.37	0.37
11	47331893	G	A	0	0.164556	0.07	0.09
11	47331897	C	G	0	0.0714618	0	0.03
11	47331918	G	A	0	0.0465298	0	0.03
11	47332074	C	T	0	0.128614	0.02	0.42
11	47332095	C	T	0	0.256802	0.23	0.23
11	47332106	G	A	0	0.279489	0.6	0.6
11	47332123	C	T	0	0.0393275	0.08	0.12
11	47332136	G	C	0	0.0854481	0.02	0.05
11	47332140	C	A	0	0.0866004	0.08	0.08
11	47332144	C	T	0	0.102063	0.19	0.19
11	47332204	G	A	0	0.0262975	0.01	0.01
11	47332209	C	A	0	0.0105025	0.01	0.01
11	47332576	C	T	0	0.0444782	0	0
11	47332578	C	T	0	0.420953	0.1	0.1
11	47332695	G	C	0	0.0322203	0.04	0.04
11	47332701	G	A	0	0.058408	0	0.11
11	47332808	C	T	0	0.167433	0	0
11	47332811	C	T	0	0.197172	0	0
11	47332878	C	T	0	0.0131204	0	0.01
11	47332891	C	G	0	0.0118591	0.05	0.05
11	47333245	G	A	0	0.0709421	0.06	0.06
11	47333300	G	C	0	0.2116	0.12	0.12
11	47333306	C	T	0	0.0329647	0.03	0.03
11	47333340	G	A	0	0.00847406	0.01	0.02
11	47333349	C	A	0	0.0443842	0	0.13
11	47333365	G	A	0	0.0167539	0	0.06
11	47333553	G	A	0	0.212021	0.1	0.1
11	47333554	C	T	0	0.192789	0	0.69
11	47333624	G	A	0	0.433142	0.95	0.95
11	47333631	T	C	0	0.0147569	0	0.03
11	47333641	G	A	0	0.0202307	0.04	0.04
11	47333649	C	T	0	0.0485364	0.46	0.46
11	47333657	C	T	0	0.0337273	0.1	0.1
11	47333682	C	T	0	0.0186428	0.03	0.03
11	47333699	G	A	0	0.100142	0.07	0.11
11	47333750	G	A	0	0.0746754	0.02	0.02
11	47333757	G	C	0	0.0885186	0.02	0.02
11	47333764	A	G	0	0.0216276	0.04	0.04
11	47333954	C	T	0	0.332556	0.48	0.48
11	47333955	G	A	0	0.107012	0.1	0.1
11	47334002	G	A	0	0.00984807	0	0.03
11	47334022	G	A	0	0.00902837	0	0
11	47335007	T	G	0	0.0188695	0	0.03
11	47335007	T	A	0	0.0138876	0	0.01
11	47335061	C	T	0	0.340479	0.3	0.3
11	47335070	C	T	0	0.038106	0.08	0.08
11	47335215	G	T	0	0.253237	0.09	0.09
11	47335990	T	A	0	0.00439854	0	0
11	47336031	G	C	0	0.0098655	0	0
11	47337360	C	A	0	0.00789851	0	0
11	47337363	G	A	0	0.00573954	0	0
11	47337392	G	T	0	0.0224564	0	0
11	47337392	G	C	0	0.0222598	0.01	0.01
11	47337446	G	T	0	0.266179	0.5	0.5
11	47337460	G	A	0	0.0182909	0.07	0.07
11	47337676	G	A	0	0.104356	0	0
11	47337684	A	G	0	0.209186	0.12	0.12
11	47337706	G	A	0	0.137958	0.08	0.08
11	47337783	C	T	0	0.0142643	0	0
11	47337792	C	T	0	0.0194289	0	0
11	47337814	C	T	0	0.0364147	0	0
11	47338517	C	T	0	0.22451	0	0.36
11	47338520	C	T	0	0.491304	0.86	0.86
11	47338521	G	A	0	0.244542	0.28	0.28
11	47338554	G	A	0	0.427606	0.73	0.73
11	47338594	T	C	0	0.229298	0.64	0.64
11	47338667	T	A	0	0.0210839	0	0
11	47338687	G	C	0	0.110034	0.01	0.01
11	47339321	C	T	0	0.0622595	0	0.09
11	47339353	C	T	0	0.404901	0.29	0.29
11	47339646	A	C	0	0.106827	0.1	0.1
11	47339683	G	A	0	0.00606175	0	0
11	47339801	C	T	0	0.0145082	0	0
11	47341113	C	T	0	0.339405	0.15	0.15
11	47341286	C	T	0	0.0224695	0	0.02
11	47341992	G	A	0	0.0963663	0.25	0.25
11	47342055	C	T	0	0.122452	0.55	0.55
11	47342060	C	T	0	0.0275934	0.06	0.06
11	47342085	A	G	0	0.0125201	0.01	0.07
11	47342117	A	G	0	0.00804099	0.01	0.01
11	47342140	C	T	0	0.0173592	0.01	0.01
11	47342164	G	C	0	0.0636347	0.26	0.26
11	47342185	C	T	0	0.0235536	0.05	0.05
11	47342601	G	A	0	0.197923	0.39	0.39
11	47342697	C	T	0	0.0163439	0.01	0.01
11	47342750	C	T	0	0.828267	0.99	0.99
11	47342761	G	A	0	0.0179697	0	0
11	47342831	A	C	0	0.0168526	0	0
11	47342890	A	T	0	0.090144	0.08	0.08
11	47342892	C	T	0	0.0677056	0.11	0.11
11	47343017	C	T	0	0.15516	0	0.31
11	47343021	C	G	0	0.598075	0.91	0.91
11	47343052	G	A	0	0.1435	0.2	0.2
11	47343254	A	G	0	0.11941	0.03	0.03
11	47343268	G	T	0	0.0546585	0.16	0.16
11	47343295	C	T	0	0.773721	0.96	0.96
11	47343614	C	A	0	0.239105	0.31	0.31
11	47343632	C	T	0	0.0906169	0.39	0.39
11	47343636	C	T	0	0.0866024	0.16	0.16
11	47343659	G	T	0	0.0301834	0.03	0.03
11	47346158	G	A	0	0.00646923	0	0
11	47346291	T	C	0	0.0159445	0.01	0.01
11	47346297	C	T	0	0.0235712	0.01	0.02
11	47346298	G	A	0	0.0262378	0.07	0.07
11	47346337	G	C	0	0.0567345	0.09	0.09
11	47346629	C	T	0	0.0686652	0.02	0.03
11	47346664	G	A	0	0.0442874	0.03	0.03
11	47347478	C	T	0	0.140015	0.06	0.06
11	47347493	C	A	0	0.265398	0	0.22
11	47347857	G	A	0	0.0150053	0.03	0.03
11	47348381	C	T	0	0.0389439	0	0
11	47348438	T	C	0	0.0350523	0	0
11	47348486	T	G	0	0.0186459	0	0
11	47348537	T	C	0	0.0215884	0	0
11	47348560	G	A	0	0.018627	0	0
11	47349770	C	T	0	0.0588546	0	0
11	47349824	T	G	0	0.0125338	0	0.01
11	47349910	G	T	0	0.0115424	0	0.02
11	47349932	C	A	0	0.0282536	0	0.03
11	47350015	C	T	0	0.16159	0.04	0.22
11	47350016	A	G	0	0.05437	0.01	0.07
11	47350018	G	A	0	0.151734	0.2	0.2
11	47350036	T	C	0	0.0123755	0.01	0.01
11	47350041	G	A	0	0.0383218	0	0.05
11	47350047	C	A	0	0.042793	0.06	0.06
11	47350497	C	G	0	0.129903	0.18	0.18
11	47350503	T	C	0	0.114761	0.27	0.27
11	47351241	G	A	0	0.935455	0.97	0.97
11	47352620	T	G	0	0.297571	0.1	0.1
11	66519596	A	T	0	0.142228	0.2	0.44
11	66696405	G	T	0	0.0353367	0.01	0.01
11	68389874	T	A	0	0.323142	0.36	0.36
11	68403483	G	T	0	0.0505945	0.01	0.01
13	32316450	C	T	0	0.0975106	0.02	0.02
13	32316522	A	G	0	0.0395745	0	0.02
13	32316531	T	C	0	0.0121925	0	0.01
13	32319088	A	G	0	0.0407001	0	0.01
13	32319176	A	C	0	0.00903112	0	0
13	32319222	T	C	0	0.01895	0	0
13	32319232	G	C	0	0.00916512	0	0
13	32319289	C	T	0	0.00681189	0	0
13	32325064	G	A	0	0.0214838	0	0.03
13	32325217	A	G	0	0.0269304	0	0
13	32326077	G	A	0	0.0618264	0.09	0.09
13	32326116	A	G	0	0.146361	0.04	0.04
13	32326176	T	C	0	0.0100097	0.01	0.01
13	32326218	A	G	0	0.0472729	0.54	0.54
13	32326272	A	G	0	0.485918	0.12	0.12
13	32326296	C	T	0	0.0150245	0	0.01
13	32326303	A	T	0	0.0133251	0	0
13	32326480	C	T	0	0.0300051	0	0
13	32326500	G	T	0	0.206112	0.01	0.08
13	32326503	G	A	0	0.0560211	0.09	0.09
13	32326555	T	C	0	0.0755422	0	0
13	32326580	A	G	0	0.0801614	0	0.07
13	32326638	C	T	0	0.0631135	0	0.04
13	32329374	T	C	0	0.00537901	0	0
13	32329434	A	G	0	0.0156485	0	0
13	32329444	C	T	0	0.0144806	0.08	0.08
13	32329491	C	T	0	0.0264175	0.02	0.02
13	32329499	A	T	0	0.0254109	0	0.04
13	32330910	T	C	0	0.0173244	0	0
13	32330915	G	C	0	0.0190093	0	0
13	32330967	G	A	0	0.0234733	0.11	0.11
13	32331009	C	A	0	0.00717328	0	0.02
13	32331076	G	A	0	0.00616791	0	0
13	32332261	T	C	0	0.0340183	0	0
13	32332605	T	G	0	0.0103806	0	0
13	32332629	C	T	0	0.00486239	0	0
13	32332719	T	G	0	0.00714452	0	0
13	32332769	A	C	0	0.00811744	0	0
13	32332873	A	C	0	0.0218023	0	0
13	32332958	G	A	0	0.0132335	0	0
13	32332992	T	C	0	0.00947966	0	0
13	32333144	A	G	0	0.0287559	0	0
13	32333270	A	G	0	0.0258188	0	0
13	32333282	G	A	0	0.0393247	0	0
13	32336214	G	T	0	0.0072407	0	0
13	32336291	A	C	0	0.0222788	0	0
13	32337158	G	C	0	0.0251143	0	0.01
13	32337165	A	C	0	0.00452545	0	0
13	32337387	C	G	0	0.00640888	0	0
13	32337428	A	G	0	0.00411195	0	0
13	32344651	A	T	0	0.33022	0.22	0.22
13	32344654	G	T	0	0.848554	0.95	0.95
13	32344727	C	G	0	0.0181655	0.01	0.01
13	32346801	T	C	0	0.00953718	0	0
13	32346823	C	T	0	0.0151689	0.01	0.01
13	32346824	T	C	0	0.0205573	0	0
13	32346895	C	T	0	0.0407453	0	0
13	32346930	A	G	0	0.0157569	0	0
13	32354799	A	G	0	0.00733249	0	0
13	32354817	A	G	0	0.00938825	0	0
13	32354817	A	T	0	0.00644977	0	0
13	32354870	G	C	0	0.0283305	0	0
13	32354874	C	T	0	0.0542746	0.04	0.04
13	32354906	A	T	0	0.0118308	0	0
13	32355095	A	T	0	0.288194	0.09	0.09
13	32355172	A	G	0	0.0449372	0	0
13	32355294	G	A	0	0.120677	0	0.05
13	32355296	A	G	0	0.0910665	0	0.05
13	32355302	A	G	0	0.067172	0	0
13	32356424	A	T	0	0.0425017	0	0.01
13	32356455	G	A	0	0.03658	0	0
13	32356496	C	T	0	0.131405	0.1	0.1
13	32356497	G	A	0	0.0327183	0	0
13	32356551	G	A	0	0.034087	0	0.1
13	32356578	G	A	0	0.010663	0	0.01
13	32356602	A	G	0	0.0163973	0	0
13	32356609	G	A	0	0.210489	0.37	0.37
13	32357756	C	T	0	0.144266	0.06	0.06
13	32357807	G	A	0	0.084947	0.02	0.04
13	32357935	C	G	0	0.109067	0.03	0.03
13	32362483	A	G	0	0.0306061	0	0
13	32362524	G	C	0	0.0387951	0	0.01
13	32362537	C	T	0	0.0568319	0.02	0.02
13	32362539	C	G	0	0.0349986	0.01	0.01
13	32362645	C	G	0	0.190064	0.03	0.03
13	32362650	A	G	0	0.329781	0	0.04
13	32362698	G	T	0	0.474858	0.89	0.89
13	32362716	C	T	0	0.0938846	0	0.01
13	32362728	C	A	0	0.0508602	0	0.01
13	32363196	A	G	0	0.022193	0	0
13	32363259	T	C	0	0.0200314	0	0
13	32363364	T	G	0	0.0547791	0	0.01
13	32363369	G	C	0	0.0788862	0	0.01
13	32363370	A	T	0	0.0463598	0	0.01
13	32363384	G	A	0	0.0230066	0	0
13	32363394	A	G	0	0.031287	0.01	0.01
13	32363460	T	C	0	0.00892137	0	0
13	32363535	T	C	0	0.878982	0.93	0.93
13	32363555	G	C	0	0.193902	0.01	0.01
13	32370348	T	G	0	0.0238971	0	0
13	32370456	C	T	0	0.097807	0.16	0.16
13	32370530	A	C	0	0.130197	0.05	0.05
13	32370530	A	G	0	0.096163	0.05	0.05
13	32370565	G	A	0	0.0489981	0	0
13	32370638	C	T	0	0.013019	0.01	0.01
13	32370661	G	A	0	0.00746248	0.03	0.03
13	32370971	T	C	0	0.00681713	0	0
13	32376654	C	G	0	0.00690171	0	0
13	32376723	C	T	0	0.0282482	0	0
13	32379361	G	A	0	0.103816	0.02	0.04
13	32379392	A	T	0	0.0169695	0	0.01
13	32379412	G	T	0	0.0263091	0	0
13	32379413	G	A	0	0.0252235	0	0
13	32379413	G	T	0	0.0132357	0	0
13	32379613	T	C	0	0.0116337	0	0
13	32379759	G	A	0	0.0688848	0	0.03
13	32379834	C	T	0	0.209857	0	0.22
13	32379900	A	C	0	0.148727	0	0.01
13	32379900	A	G	0	0.152693	0.01	0.01
13	32379904	A	G	0	0.110778	0.04	0.04
13	32379912	C	T	0	0.292395	0.08	0.08
13	32380105	G	A	0	0.143739	0.06	0.06
13	32380107	A	G	0	0.215435	0.22	0.22
13	32380131	T	C	0	0.0318369	0	0
13	32380203	A	T	0	0.00880591	0	0
13	32394576	T	G	0	0.00734407	0	0
13	32394606	G	A	0	0.00627097	0	0
13	32394673	T	C	0	0.00509845	0	0
13	32394707	A	G	0	0.00778877	0	0
13	32394799	A	G	0	0.123269	0.19	0.19
13	32394888	G	T	0	0.0175313	0	0
13	32394937	A	G	0	0.0798742	0.01	0.01
13	32394942	A	C	0	0.00758133	0	0
13	32396885	C	G	0	0.482923	0.71	0.71
13	32396886	T	G	0	0.0767893	0.02	0.02
13	32396946	C	G	0	0.0200034	0.01	0.01
13	32396982	A	G	0	0.0281583	0	0
13	32397000	C	T	0	0.0107845	0	0
13	32397001	C	T	0	0.0119364	0	0
13	32398142	C	T	0	0.0611273	0.03	0.03
13	32398243	G	A	0	0.0200453	0.06	0.06
13	32398418	G	A	0	0.0288223	0	0.01
13	32398558	A	G	0	0.110171	0	0.05
13	32398623	G	A	0	0.0315994	0	0
13	32398762	T	C	0	0.00971687	0	0
14	21302102	C	T	0	0.00905071	0	0
15	48412646	C	T	0	0.0236995	0.01	0.04
15	48415550	G	C	0	0.0148926	0	0
15	48415671	T	C	0	0.0193746	0	0
15	48420752	A	G	0	0.00861091	0	0
15	48421593	C	A	0	0.139456	0.01	0.01
15	48421624	G	A	0	0.00341772	0	0
15	48421675	A	G	0	0.0130775	0	0.01
15	48425443	T	C	0	0.305542	0.52	0.52
15	48427560	G	C	0	0.0142857	0	0
15	48427768	G	A	0	0.0396016	0	0
15	48428472	C	T	0	0.826106	0.98	0.98
15	48430727	T	C	0	0.0313609	0	0
15	48432911	A	G	0	0.0177311	0	0
15	48437830	C	G	0	0.0127433	0	0
15	48437920	G	A	0	0.143452	0.08	0.08
15	48441726	C	T	0	0.0921201	0.01	0.01
15	48444547	A	C	0	0.101334	0.02	0.02
15	48444652	C	T	0	0.0301944	0.01	0.03
15	48445459	C	T	0	0.00904072	0.01	0.01
15	48445504	T	C	0	0.0485454	0	0.01
15	48446787	C	T	0	0.0182938	0	0
15	48446816	T	C	0	0.0134029	0	0
15	48448812	C	T	0	0.00440917	0	0
15	48452610	A	G	0	0.0144829	0	0.01
15	48456682	A	G	0	0.0147139	0	0
15	48456687	C	A	0	0.010163	0	0
15	48463943	C	T	0	0.0132641	0	0
15	48465826	C	T	0	0.0108848	0	0
15	48470750	T	C	0	0.0530673	0	0
15	48474369	C	T	0	0.0176931	0	0
15	48474584	C	T	0	0.00737521	0	0
15	48474588	C	T	0	0.0156058	0	0
15	48474641	T	A	0	0.015259	0	0
15	48481656	T	C	0	0.32747	0.45	0.45
15	48483884	G	A	0	0.00431289	0	0
15	48485374	C	T	0	0.165538	0.54	0.54
15	48487131	T	C	0	0.0107684	0	0
15	48487155	C	T	0	0.00753872	0	0
15	48487309	T	G	0	0.677141	0.72	0.72
15	48487431	T	C	0	0.0339164	0	0
15	48488118	C	T	0	0.00553777	0	0
15	48488182	G	A	0	0.00277725	0	0
15	48488379	C	G	0	0.0288193	0	0
15	48488452	C	G	0	0.0101197	0	0
15	48489980	C	T	0	0.0234359	0	0
15	48489981	G	T	0	0.0357686	0	0
15	48490006	C	T	0	0.00418893	0	0
15	48495155	G	A	0	0.0109304	0.01	0.01
15	48495162	C	T	0	0.0231356	0.02	0.02
15	48496150	C	T	0	0.00620239	0	0
15	48505069	C	T	0	0.00629845	0	0
15	48505076	A	G	0	0.00772289	0.01	0.01
15	48505102	C	T	0	0.00474128	0	0.02
15	48505139	C	T	0	0.0109864	0	0
15	48510125	G	A	0	0.00578585	0	0
15	48510163	T	C	0	0.0438917	0	0
15	48513549	C	T	0	0.343164	0.25	0.25
15	48513627	A	G	0	0.0806642	0	0.03
15	48515429	A	T	0	0.0700347	0	0.05
15	48516341	G	A	0	0.00704169	0	0.02
15	48537707	C	T	0	0.0110544	0	0
15	48596279	T	C	0	0.0844262	0.23	0.23
15	48600148	A	G	0	0.0228209	0	0.09
15	48600217	G	A	0	0.0632356	0.04	0.04
15	48613073	G	A	0	0.00676376	0	0
15	67181384	C	T	0	0.00854206	0	0
16	2116141	A	G	0	0.0842249	0.13	0.13
16	88716447	G	A	0	0.0147146	0.01	0.01
16	88717032	G	T	0	0.0240037	0	0
16	89281031	C	T	0	0.014648	0	0
17	7673897	C	T	0	0.0212912	0	0
17	7674908	T	C	0	0.0229031	0.01	0.04
17	7675995	G	A	0	0.137049	0.03	0.03
17	43045732	C	T	0	0.0374462	0	0
17	43045807	A	T	0	0.0627135	0	0
17	43045810	C	T	0	0.0230359	0	0
17	43045812	G	T	0	0.0904581	0	0
17	43047679	G	T	0	0.067998	0.03	0.04
17	43047685	C	A	0	0.185172	0.13	0.13
17	43047699	A	T	0	0.0375579	0	0.05
17	43047703	C	A	0	0.17943	0.13	0.13
17	43049076	G	T	0	0.0120889	0	0
17	43049088	T	A	0	0.0301093	0	0
17	43049113	A	G	0	0.0117623	0	0
17	43049193	A	G	0	0.0225797	0	0
17	43049194	T	C	0	0.0341512	0	0
17	43051024	G	A	0	0.00583705	0	0
17	43051050	C	A	0	0.0268775	0	0
17	43056974	C	T	0	0.00399976	0	0
17	43057046	C	G	0	0.00859491	0	0
17	43057077	C	T	0	0.00455931	0	0
17	43057078	G	T	0	0.00561495	0	0
17	43057122	A	G	0	0.00509085	0	0
17	43057131	T	C	0	0.00865126	0	0
17	43057141	A	G	0	0.0372579	0.01	0.01
17	43063269	A	C	0	0.0437104	0	0
17	43063369	C	A	0	0.0139349	0.01	0.01
17	43063372	C	A	0	0.0696799	0.01	0.01
17	43063373	C	G	0	0.156838	0.04	0.04
17	43063379	G	T	0	0.0651541	0.02	0.03
17	43063386	T	C	0	0.0309093	0	0
17	43063407	A	C	0	0.354656	0.08	0.08
17	43063780	A	C	0	0.0105285	0	0
17	43063909	C	T	0	0.0300388	0.02	0.03
17	43063910	C	T	0	0.0575612	0.06	0.06
17	43063930	C	T	0	0.146787	0.15	0.15
17	43063957	G	T	0	0.194186	0.24	0.24
17	43063960	T	A	0	0.0438651	0	0.13
17	43067516	A	G	0	0.0119927	0	0
17	43067601	G	A	0	0.0536621	0	0.07
17	43067602	G	C	0	0.0581648	0	0.08
17	43067603	T	A	0	0.0264501	0.04	0.04
17	43067610	G	T	0	0.0525148	0	0.05
17	43067610	G	C	0	0.249269	0.28	0.28
17	43067611	T	C	0	0.0642646	0.07	0.07
17	43067658	G	A	0	0.040449	0.03	0.04
17	43067688	A	T	0	0.0214459	0	0.01
17	43067706	A	G	0	0.222506	0.26	0.26
17	43070929	A	G	0	0.0442552	0.01	0.01
17	43070958	C	T	0	0.030822	0	0.01
17	43071073	G	A	0	0.00997426	0	0.01
17	43071102	T	C	0	0.0105882	0	0
17	43071232	G	A	0	0.00424248	0	0
17	43071246	G	C	0	0.0392349	0	0
17	43074353	A	G	0	0.0300908	0.03	0.03
17	43074370	C	T	0	0.0389563	0	0.03
17	43076473	A	G	0	0.023354	0	0
17	43076474	T	C	0	0.0341387	0.01	0.01
17	43076527	T	C	0	0.220759	0.13	0.13
17	43076579	T	C	0	0.0887802	0.11	0.11
17	43076624	G	A	0	0.151809	0.1	0.11
17	43082345	G	T	0	0.00698127	0	0
17	43082394	C	T	0	0.0175902	0	0
17	43082418	C	T	0	0.0117844	0	0
17	43091032	C	T	0	0.118136	0.12	0.12
17	43091043	A	G	0	0.0521285	0.02	0.02
17	43091061	G	A	0	0.00797569	0	0
17	43091686	T	A	0	0.0542022	0.02	0.02
17	43092484	T	C	0	0.0083711	0	0
17	43093800	T	C	0	0.00570443	0	0
17	43095838	G	A	0	0.473126	0.6	0.6
17	43095904	C	G	0	0.034317	0	0.01
17	43095926	T	C	0	0.0547535	0	0.02
17	43095937	C	G	0	0.0700199	0	0.08
17	43095956	A	G	0	0.0413562	0	0.02
17	43097236	T	C	0	0.0446772	0	0
17	43097241	C	T	0	0.0658087	0.01	0.02
17	43097249	A	G	0	0.0240031	0	0.01
17	43097280	G	T	0	0.0876342	0.04	0.04
17	43097285	A	G	0	0.0549547	0.01	0.01
17	43097306	C	A	0	0.0601619	0	0.01
17	43099768	C	T	0	0.060828	0	0.01
17	43099769	C	T	0	0.0460774	0	0
17	43099786	T	C	0	0.0264462	0	0
17	43099813	C	T	0	0.0513101	0.02	0.02
17	43099874	T	C	0	0.0946196	0.01	0.01
17	43099896	A	C	0	0.194338	0.01	0.06
17	43099905	C	T	0	0.177683	0	0.01
17	43104071	A	G	0	0.00614454	0	0
17	43104104	G	A	0	0.0478547	0	0
17	43104134	T	G	0	0.0175642	0	0
17	43104147	T	C	0	0.0393421	0	0
17	43104266	A	G	0	0.0293768	0	0
17	43104861	C	T	0	0.402767	0.02	0.29
17	43104883	C	T	0	0.156177	0.14	0.14
17	43104883	C	G	0	0.0718918	0.06	0.06
17	43104914	C	T	0	0.0660494	0.03	0.06
17	43104938	C	T	0	0.0868862	0.01	0.01
17	43106433	A	T	0	0.0564547	0	0.04
17	43106469	C	A	0	0.103651	0.19	0.19
17	43106477	C	T	0	0.762077	0	0.87
17	43106479	T	A	0	0.285811	0	0.32
17	43106528	C	A	0	0.0307788	0	0.02
17	43115727	T	G	0	0.117204	0.06	0.06
17	43115750	G	C	0	0.0326983	0.01	0.01
17	43115785	A	G	0	0.036866	0	0.01
17	43115791	G	C	0	0.0810638	0.01	0.01
17	43115792	G	T	0	0.0704286	0.01	0.01
17	43115792	G	C	0	0.077309	0	0
17	43115793	G	A	0	0.0254466	0	0
17	43115828	T	G	0	0.00861698	0.01	0.01
17	43115844	C	G	0	0.00905115	0	0
17	43124061	T	C	0	0.0257124	0.02	0.04
17	43124076	G	A	0	0.0195171	0.02	0.02
17	43124078	G	A	0	0.108307	0.15	0.15
17	43124125	A	G	0	0.150943	0.06	0.06
19	50407108	C	T	0	0.0135208	0	0
19	54123711	C	T	0	0.0191722	0	0.01
20	10412712	A	C	0	0.129606	0	0.01
20	10412766	C	T	0	0.0661209	0	0
21	46121493	G	A	0	0.0160233	0	0
22	41514735	C	T	0	0.00597901	0	0
X	70035390	C	G	0	0	0	0
X	71375242	C	A	0	0.0916049	0.12	0.12
X	154362058	T	A	0	0.0224736	0	0
